1 **A forward genetic approach to mapping a *P*-element second site mutation identifies *DCP2* as a**  
2 **novel tumor suppressor in *Drosophila melanogaster***

3 Rohit Kunar<sup>1a</sup>, Rakesh Mishra<sup>1a</sup>, Lolitika Mandal<sup>2</sup>, Debasmita P. Alone<sup>3</sup>, Shanti Chandrasekharan<sup>4</sup> and  
4 Jagat Kumar Roy<sup>1\*</sup>

5 <sup>1</sup>Cytogenetics Laboratory, Department of Zoology, Institute of Science, Banaras Hindu University,  
6 Varanasi–221005, Uttar Pradesh, India

7 <sup>2</sup>Department of Biological Sciences, Indian Institute of Science Education and Research (IISER) Mohali,  
8 Manauli–140306, India

9 <sup>3</sup>School of Biological Sciences, National Institute of Science Education and Research (NISER) PO  
10 Bhimpur-Padanpur, Pin–752050, Odisha, India

11 <sup>4</sup>Division of Genetics, Indian Agricultural Research Institute (IARI), Pusa, New Delhi, Delhi–110012,  
12 India

13

14 <sup>a</sup> Both authors contributed equally to the work

15

16 Email ID of authors –

17 Rohit Kunar: [rohit.kunar3@bhu.ac.in](mailto:rohit.kunar3@bhu.ac.in)

18 Rakesh Mishra: [shivrakesh@gmail.com](mailto:shivrakesh@gmail.com)

19 Lolitika Mandal: [lolitika@iisermohali.ac.in](mailto:lolitika@iisermohali.ac.in)

20 Debasmita P Alone: [debasmita@niser.ac.in](mailto:debasmita@niser.ac.in)

21 Shanti Chandrasekharan: [shanty@iari.res.in](mailto:shanty@iari.res.in)

22 Jagat Kumar Roy: [jkroy@bhu.ac.in](mailto:jkroy@bhu.ac.in)

23

24 **\*Address for Correspondence –**

25 Cytogenetics Laboratory, Department of Zoology,  
26 Institute of Science, Banaras Hindu University,  
27 Varanasi – 221005, Uttar Pradesh, India.

28 Phone: +91-542-236-8145 Fax: +91-542-236-8457

29 E-mail: [jkroy@bhu.ac.in](mailto:jkroy@bhu.ac.in)

30

31 **Running title – *Drosophila DCP2* is a tumour suppressor**

32

33 **Abstract**

34 The use of transposons to create mutants has been the cornerstone of *Drosophila* genetics in the past few  
35 decades. Transpositions often create second-site mutations, devoid of transposon insertion and thereby  
36 affect subsequent phenotype analyses. In a *P*-element mutagenesis screen, a second site mutant was  
37 discovered on chromosome 3 wherein the homozygous mutant individuals show the classic hallmarks of  
38 mutations in tumor suppressor genes including brain tumour and lethality, hence the mutant line was  
39 initially named as *lethal (3) tumorous brain [l(3)tb]*. Classical genetic approaches relying on meiotic  
40 recombination and subsequent complementation with chromosomal deletions and gene mutations mapped  
41 the mutation to CG6169, the mRNA decapping protein 2 (*DCP2*), on the left arm of the third  
42 chromosome (3L), and thus the mutation was renamed as *DCP2<sup>l(3)tb</sup>*. Fine mapping of the mutation further  
43 identified the presence of a *Gypsy*-LTR like sequence in the 5'UTR coding region of *DCP2*, alongwith  
44 expansion of the adjacent upstream intergenic AT-rich sequence. The mutant phenotypes are rescued by  
45 Introduction of a functional copy of *DCP2* in the mutant background, thereby establishing the causal role  
46 of the mutation and providing a genetic validation of the allelism. With the increasing repertoire of genes  
47 being associated with tumor biology this is the first instance that the mRNA decapping protein is being  
48 implicated in *Drosophila* tumorigenesis. Our findings therefore imply a plausible role for mRNA  
49 degradation pathway in tumorigenesis and identify *DCP2* as a potential candidate for future explorations  
50 of cell cycle regulatory mechanisms.

51 **Keywords** – *DCP2*, tumor suppressor, *Drosophila*, genetic mapping

52

## 53 Introduction

54 With increasing interest in studies of classical tumor suppressors (Papagiannouli and Mechler, 2013;  
55 Ivanov et al., 2010), the search for new candidate proteins in tumor suppression has garnered importance  
56 (Tipping and Perrimon, 2013). In *Drosophila*, *P*-element mutagenesis provides a convenient method to  
57 identify, isolate and clone tagged genes while probing for genes which could be mutated to tumor  
58 formation (Mechler, 1994). Although identification and subsequent molecular analysis is convenient with  
59 *P*-element transpositions, second-site mutations devoid of any *P*-element insertion may be created during  
60 transposition (Liebl et al., 2006). In a *P*-element mutagenesis screen, a second site mutant was discovered  
61 wherein the homozygous mutant individuals showed prolonged larval life, developed larval brain tumors  
62 with increased number of superficial neuroblasts and abnormal chromosomal condensation along with  
63 overgrowth in the wing and the eye-antennal discs and were lethal in the larval/pupal stages. Since all  
64 these are hallmarks of mutations in tumor suppressor genes in *Drosophila* (Gateff and Schneiderman,  
65 1969; Gateff E, 1974; Gateff E, 1978), the mutation was named as *l(3)tb* [*l(3)tb: lethal (3) tumorous*  
66 *brain*] owing to its location on the third chromosome and the phenotypes manifested. Genetic and  
67 molecular analyses mapped the mutation to *DCP2* on the left arm of chromosome 3 (cytogenetic position  
68 72A1) and hence the allele was named as *DCP2<sup>l(3)tb</sup>*. While complementation analyses of the mutation  
69 with alleles of *DCP2* show phenotypes similar to *l(3)tb* homozygotes and confirm the proposed allelism,  
70 over-expression of wild type *DCP2* in the mutant background rescues the mutant phenotypes, thereby  
71 providing a genetic validation of allelism. Subsequent fine mapping identified the presence of a *Gypsy*-  
72 LTR like sequence in the 5'UTR coding region, downstream to the transcription start site (TSS) of *DCP2*.  
73 *DCP2* codes for the mRNA decapping protein 2, which belongs to the NUDIX family of  
74 pyrophosphatases and was identified almost a decade ago through a yeast genetic screen (Dunckley and  
75 Parker, 1999). Being one of the major components of the decapping complex, *DCP2* is conserved in  
76 worms, flies, plants, mice, and humans (Wang et al., 2002). *DCP2* is activated by *DCP1* and they function  
77 together as a holoenzyme to cleave the 5' cap structure of mRNA (LaGrandeur and Parker, 1998; Coller  
78 and Parker, 2004; Parker and Song, 2004; She et al., 2008). *DCP2<sup>l(3)tb</sup>* bears an incomplete LTR sequence  
79 from the *gypsy* element and develops brain tumors in *Drosophila*, thereby demanding considerable  
80 exploration of the exact perturbations in the DNA-protein interactions caused by its presence. Although  
81 mRNA decapping plays a significant role in mRNA turnover and translation, widely affecting gene  
82 expression (Mitchell and Tollervey, 2001; Raghavan and Bohjanen, 2004; Song et al., 2010),  
83 simultaneous links between mRNA degradation genes, retrotransposons and tumors have not been  
84 observed and/or investigated so far. Therefore, the novel allele *DCP2<sup>l(3)tb</sup>* reveals a new perception for  
85 functional roles of mutant lesions and the ensuing perturbations in gene regulation in tumor biology.

## 86 **Materials and Methods**

### 87 **Fly strains and rearing conditions**

88 All flies were raised on standard agar-cornmeal medium at  $24\pm 1^\circ\text{C}$ . *Oregon R*<sup>+</sup> was used as the wild type  
89 control. The *l(3)tb* mutation (*yw*; *+/+*; *l(3)tb* /*TM6B*, *Tb*<sup>1</sup>, *Hu*, *e*<sup>1</sup>) was isolated in a genetic screen and the  
90 mutation was maintained with the *TM6B* balancer. The multiply marked “*rucuca*” (*ru h th st cu sr e*  
91 *ca/TM6B,Tb*) and “*ruPrica*” (*ru h th st cu sr e Pr ca/TM6B,Tb*) chromosomes were employed for  
92 recombination mapping (Lindsley and Zimm 1992). *w*;  $\Delta 2-3$ , *Sb/TM6B*, *Tb*<sup>1</sup>, *Hu*, *e*<sup>1</sup> (Cooley *et al.* 1988)  
93 and *CyO*, *P{Tub-Pbac/T}2/Wg<sup>Sp-1</sup>;+/TM6B*, *Tb*, *Hu*, *e*<sup>1</sup> were used for providing transposase source for *P*  
94 element and *piggyBac* specific transposable element, respectively, in mutagenesis experiment. The *y*<sup>1</sup>*w*;  
95 *P{Act5C-GAL4}25F01/CyO* and *yw*; *+/+*; *Tub-GAL4/ TM3*, *Sb*, *e*, were obtained from the Bloomington  
96 *Drosophila* Stock Center. The lethal insertion mutants of gene *DCP2*, viz., *PBac{RB}DCP2<sup>e00034</sup>/TM6B*,  
97 *Tb*<sup>1</sup> *Hu*, *e*<sup>1</sup> (Thibault *et al.* 2004) and *P{GT1}DCP2<sup>BG01766</sup>/TM3*, *Sb*<sup>1</sup>, *e*<sup>1</sup> (Lukacsovich *et al.* 2001) were  
98 obtained from Exelixis Stock Center, Harvard University and Bloomington *Drosophila* stock center,  
99 respectively.

100 Deficiency stock *Df(3L)RM96* was generated in the laboratory (for details of characterisation, refer to  
101 **Supplementary Table S3**) using progenitor *P* element stocks viz. *P{RS5}5-SZ-3486*, *P{RS5}5-SZ-3070*,  
102 *P{RS3}UM-8356-3*, *P{RS3}UM-8241-3*, *P{RS3}CB-0072-3*, *yw P{70FLP, ry<sup>+</sup>}3F<sup>iso</sup>/y<sup>+</sup>Y; 2<sup>iso</sup>*;  
103 *TM2/TM6C*, *Sb*, *w<sup>1118</sup><sub>iso</sub>/y<sup>+</sup>Y; 2<sup>iso</sup>*; *TM2/TM6C*, *Sb* obtained from Vienna *Drosophila* Resource Center  
104 (Golic and Golic, 1996; Ryder *et al.* 2007). Various deficiency stocks and transposon insertion fly stocks  
105 (**Supplementary Tables S1 and S2**) used for complementation analysis were obtained from  
106 Bloomington *Drosophila* stock centre and Exelixis stock centre.

### 107 **Analysis of lethal phase in *l(3)tb* homozygotes**

108 For analysis of lethal phase and morphological anomalies associated with the homozygous *l(3)tb*  
109 mutation, embryos were collected at the intervals of 2h on food filled Petri dishes. Embryos from wild  
110 type flies were collected as controls. The total number of eggs in each plate was counted and the embryos  
111 were allowed to grow at  $23^\circ\text{C}$  or  $18^\circ\text{C}$  or  $16^\circ\text{C}$  ( $\pm 1^\circ\text{C}$ ). Hatching of embryos and further development of  
112 larval stages was monitored to determine any developmental delay. Mutant larvae, at different stages,  
113 were dissected and the morphology of larval structures was examined.

### 114 **Identification of Mutant Locus in *l(3)tb* –**

#### 115 **a. Meiotic recombination mapping of *l(3)tb* mutation**

116 Genetic recombination with multiple recessive chromosome markers, *ru cu ca*, was performed to map  
117 mutation in *y w: +/+; l(3)tb/TM6B, Tb* mutant. The *y w; l(3)tb/TM6B* males were crossed to virgin *+/+;*  
118 *ru Pri ca/TM6B* females to recover *l(3)tb* without *y w* on X-chromosome. The F1 *l(3)tb/TM6B* males were  
119 crossed to virgin *+/+; ru cu ca* females and the F2 progeny *+/+; l(3)tb/ru cu ca* virgin females were  
120 selected. These F2 virgins were then crossed to *ru Pri ca/TM6B* males to score the frequency of  
121 recombinants in the F3 progeny. Thereafter, all the F3 progeny males obtained, were individually scored  
122 for *ru, h, th, st, cu, sr, e* and *ca* phenotypes and then they were individually crossed with virgin  
123 *l(3)tb/TM6B* females to identify which of them had the *l(3)tb* mutation along with other scored markers.

#### 124 **b. Complementation mapping of the *l(3)tb* mutation**

125 Complementation analysis of the mutation in *l(3)tb* allele was carried out in two stages. Firstly, deficiency  
126 stocks spanning the entire chromosome 3 (**Supplementary Table S1**) were used to identify the mutant  
127 loci, and secondly, lethal *P*-insertion alleles selected from the region narrowed down through  
128 recombination and deficiency mapping (**Supplementary Table S2**) were harnessed to further identify the  
129 mutant gene(s) in *l(3)tb*. In either case, virgin females of *yw; +/+; l(3)tb/TM6B, Tb* were crossed with the  
130 males of the various deficiency stocks and/or the lethal *P*-insertion alleles and the non-tubby F1 males  
131 heterozygous for *l(3)tb* and the deficiency were scored for the phenotype(s).

132 Reversion analysis was performed by the excision of *piggyBac* transposon in *DCP2<sup>e00034</sup>* with the help of  
133 *piggyBac* specific transposase source, *CyO, P{Tub-Pbac}2/Wg<sup>SP-1</sup>* (Thibault *et al.* 2004) or by the  
134 excision of *P*-element in *DCP2<sup>BG01766</sup>* strain using transposase from the ‘jumpstarter’,  $\Delta 2-3, Sb/TM6B, Tb^1,$   
135 *Hu, e<sup>1</sup>*. Virgin flies from the ‘mutator stocks’, *viz.*, *DCP2<sup>e00034</sup>* or *DCP2<sup>BG01766</sup>* strain were crossed to male  
136 flies from respective ‘jumpstarter stock’. F1 male flies with mosaic eye pigmentation carrying both the  
137 transposase and respective transposons were selected and crossed to JSK-3 (*TM3, Sb, e<sup>1</sup>/TM6B, Tb<sup>1</sup>, Hu,*  
138 *e<sup>1</sup>*) virgins and from the next generation (F2), rare white eyed revertant flies were selected (Figure S1).

#### 139 **Fine Mapping of *l(3)tb* mutation –**

##### 140 **a. Genomic DNA Isolation, PCR and Southern hybridisation**

141 Genomic DNA for polymerase chain reaction (PCR) was isolated by homogenizing 50 male flies from  
142 each of the desired genotype or 80-100 third instar larvae from homozygous mutant *l(3)tb* (Sambrook *et*  
143 *al.* 1989). Based on the results obtained from genetic mapping, identification of the candidate region in  
144 *DCP2* was done by overlapping PCR based screening, wherein the entire genomic span of *DCP2* was  
145 amplified using 28 primer pairs from 3L:15811834..15819523 (**Supplementary Tables S4, S5, S6**)  
146 (Rozen and Skaletsky 2000). After identifying the candidate region, it was validated with the primer pair,  
147 Dbo\_F: 5'-ACAACATTCCTCCATGGAACACCT-3' and DCP2\_P19\_R: 5'-

148 TGCTCACCGAACTTTTTTCGCGATCT-3'. The primer pair DCP2\_F: 5'-  
149 ATAACAAAAAAGTTATGGTACCACCCCGCGTTGTATTCT-3' and DCP2\_R: 5'-  
150 AGATTTCGATGTATATGGATCCGTCCTCCCAACCTTTGCGTCT-3' was designed to amplify the full  
151 length gene along with flanking sequences (500 bp on either side). In either case, the thermal cycling  
152 parameters included an initial denaturation at 96°C (2 min) followed by 30 cycles of 30 s at 94°C, 45 s at  
153 72°C, and 15 min at 68°C. Final extension was carried out at 68°C for 20 min. The PCR products were  
154 electrophoresed on 0.8% agarose gel with O'GeneRuler 1kb plus DNA ladder (Thermo Scientific, USA).  
155 An 812 bp region (3L: 15825979..15826790) spanning the candidate mutated region in *DCP2* was PCR  
156 amplified and ligated in pGEM-T vector (Promega) to generate the pGEM-T-812 clone. The ~430 bp  
157 fragment isolated during primer walking (see below) was purified and ligated in pTopo-TA-XL vector  
158 (Invitrogen, USA) to generate the pTopo-TA-XL-430 clone. Digestion, ligation and transformation were  
159 performed using standard protocols as described in Sambrook and Russell, 2001. Southern hybridizations  
160 were performed according to Sambrook and Russell, 2001. Following electrophoresis and gel pre-  
161 treatments, DNA was transferred on to positively charged nylon membranes (Roche, Germany).  
162 Hybridizations were performed at 68°C with 0.02% SDS, 5X SSC, 0.5% Blocking reagent, and 0.1%  
163 laurylsarcosine with probes generated from pGEM-T-812 and pTopo-TA-XL-430 plasmids. DIG  
164 Labelling and chemiluminescent detection were performed as per the manufacturer's instructions (Roche,  
165 Germany).

#### 166 **b. Sequencing, Primer Walking and CNV detection**

167 To confirm the fidelity of amplification automated DNA Sequencing was performed (ABI – 3130, USA)  
168 as per the manufacturer's instructions. Primer walking was initiated with the primers Dbo\_F and  
169 DCP2\_P19\_R and from the terminal part of the sequence obtained, new primers P19\_W2\_F 5'-  
170 GGAGATCTGTTTGAAATATCTCTTCACATT-3' and P19\_W2\_R 5'-  
171 GGCGCGTCAGCATTGTTTCATACAAAGCTAC-3' were designed. Long-range PCR with P19\_W2 was  
172 performed as described previously. Sequence chromatograms were assessed and analyzed with FinchTV  
173 1.4.0, Geospiza Inc. Semi-quantitative assessment of copy number variance (CNV) of the intergenic  
174 sequence in *DCP2*<sup>(3)<sup>nb</sup></sup> was determined through PCR analyses. A 156 bp sequence (3L:  
175 15826497..15826652) was chosen to be amplified by CNV\_F 5'- ACAGTTGGCTCTGTGATAAATGT-  
176 3' and CNV\_R 5'- AGTGCAACGGAAGGGAATCT-3' against an internal control sequence of 153 bp,  
177 corresponding to the gene *Dsor*, amplified by the primer pair. Thermal cycling parameters included an  
178 initial denaturation at 95°C (5 min) followed by 28 cycles of 30 s at 94°C, 30 s at 60°C, and 30 s at 72°C.  
179 Final extension was carried out at 72°C for 10 min. The PCR products were electrophoresed on 2%  
180 agarose gel with a 100-bp DNA ladder (BR Biosciences, India).

## 181 **Immunocytochemistry**

182 The imaginal discs and/or brain ganglia were collected from wild type *Oregon R*<sup>+</sup> wandering 3<sup>rd</sup> instar  
183 larvae, just before pupation (110 h, AEL) and in mutant homozygous *l(3)tb* from day 6 and day 10/12.  
184 The tissues were processed for immunostaining as described in Banerjee and Roy, 2018, with the desired  
185 antibodies. Primary antibodies used in this study were - Anti-Discs large, 4F3 (1:50, Developmental  
186 Studies Hybridoma Bank, Iowa, USA), Anti-Armadillo (1:100, a kind gift by Prof LS Shashidhara, IISER  
187 Pune, India), Anti-Elav (Rat-Elav-7E8A10, 1:100, DSHB, USA), Anti-DE-Cadherin (DCAD2, 1:20,  
188 DSHB, Iowa, USA), Anti-phospho-Histone 3 (1:500, Millipore, Upstate, USA), Anti-Deadpan (1:800, a  
189 kind gift from Prof. Volker Hartenstein, University of California, USA) and Anti-Cyclin E (HE12; sc-  
190 247, 1:50, Santa Cruz, India). Appropriate secondary antibodies conjugated either with Cy3 (1:200,  
191 Sigma-Aldrich, India) or Alexa Fluor 488 (1:200; Molecular Probes, USA) or Alexa Fluor 546 (1:200;  
192 Molecular Probes, USA) were used to detect the given primary antibody, while chromatin was visualized  
193 with DAPI (4', 6-diamidino-2-phenylindole dihydrochloride, 1µg/ml Sigma-Aldrich). Counterstaining  
194 was performed with either DAPI (4', 6-diamidino-2-phenylindole dihydrochloride, Sigma) at 1µg/ml, or  
195 phalloidin-TRITC (Sigma-Aldrich, India) at 1:200 dilutions. Tissues were mounted in DABCO (antifade  
196 agent, Sigma). The immunostained slides were observed under Zeiss LSM 510 Meta Laser Scanning  
197 Confocal microscope, analysed with LSM softwares and assembled using Adobe Photoshop 7.0.

## 198 **Statistical analysis**

199 Sigma Plot (version 11.0) software was used for statistical analyses. All percentage data were subjected to  
200 arcsine square-root transformation. For comparison between the control and experimental samples, One-  
201 Way ANOVA was performed. Data were expressed as mean ± S.E. of mean (SEM) of several replicates.

## 202 **Results**

### 203 ***l(3)tb* homozygotes show the classic hallmarks of cancer in *Drosophila* including developmental** 204 **delay, abnormal karyotype, larval/pupal lethality alongwith tumorous brain and wing imaginal disc**

205 Developmental analysis of *l(3)tb* homozygotes showed that while embryos hatched normally and  
206 developed alike their heterozygous siblings [*l(3)tb/TM6B*], the third instar larvae reached the wandering  
207 stage quite late with the larval stage extending up to 12 or 13 days (**Figure 1B**). Although 66.8% of the  
208 larvae survived to pupate (**Table 1**), they died in the pupal stage following bloating, enhancement in size  
209 and cessation of growth (**Figure 1A**). Hence, the mutation is absolutely lethal with the lethality being  
210 pronounced in the pupal stage. Lowering the temperature to 16°C or 18°C reduced the larval mortality,  
211 causing 96% of larvae to pupate but did not improve pupal survival (**Figure 1 C and D**). Analysis of  
212 larval brain and imaginal discs in the homozygotes in the early (Day 6) and late (Day 10-12) larval phase

213 showed gross morphological alterations in the size of the larval brain, wing and eye imaginal discs  
214 (**Figure 2A–G**) as compared to the wandering wild type third instar larvae (115h ALH; **A**fter **L**arval  
215 **H**atching). The brain was smaller in size than the wild type (*Oregon R*<sup>+</sup>) or heterozygous [*l(3)tb/TM6B*]  
216 individuals till 115 ALH but started showing aberrant growth in the dorsal lobes thereafter, showing  
217 significant differences in the diameter and area of the lobes. The overgrown brain hemispheres remained  
218 more or less symmetric in most of the cases, except in some where it got deformed and fused with the  
219 imaginal discs (**Figure 2 J and K**). A similar trend in morphological aberration was observed in the wing  
220 discs, which remained smaller initially but enlarged sufficiently later (**Figure 2L**), with abnormal  
221 protrusion in the wing pouch. Analysis of mitotically active cell population by screening for the  
222 metaphase marker protein, phosphorylated histone H3 (PH3) revealed increased number of active mitoses  
223 in the mutant homozygous brains (**Figure 3A–O; 3V**) and wing discs (**Figure 3P–V**) (Day 6) in  
224 comparison to the wild type, the number of which increased with increase in larval age of the mutant.  
225 However, mitotic karyotypes of the mutant brain lacked numerical aberrations, despite showing extensive  
226 variability in condensation (**Figure 2 H and I**).

227

### 228 **Eye-antennal discs and leg imaginal discs also show morphological and developmental anomalies in** 229 ***l(3)tb* homozygous individuals**

230 Global analysis of morphological aberrations in the mutant homozygotes showed that besides the  
231 tumorous brain and wing imaginal discs, eye-antennal discs and leg imaginal discs were also overgrown  
232 with a transparent appearance. Expression of Elav and Dlg in the eye-antennal discs revealed similarities  
233 to the developmental perturbations observed in the wing discs and brain. In the early third instar mutant  
234 larvae (Day 6), all photoreceptor cells showed expression of Elav, similar to the wild type tissue (**Figure**  
235 **4J and N**). However, during advanced stages of larval tumorigenesis (Day 10), it dwindled eventually  
236 (**Figure 4R**). The Elav expressing cells which are posterior to the morphogenetic furrow co-express Dlg  
237 and demonstrate the typical ommatidial arrangement. In the mature mutant larvae however, the eye discs  
238 demonstrate significant deviations from the normal regular arrangement of ommatidia. The leg imaginal  
239 discs, which reside in close proximity to the brain and wing imaginal discs also show enlargement in size  
240 which increases with advancement and retention of larval stage. They show gradual disruption of normal  
241 expression of DE-cadherin and Armadillo (**Figure 5**), alike tumorous wing discs (see above), implying  
242 the mutation and subsequent tumor to affect developmental homeostasis in adjacent tissues as well.

243

### 244 **Genetic mapping through meiotic recombination and complementation mapping identify *l(3)tb* to** 245 **be allelic to *DGP2***



246 The mutation *l(3)tb*, being recessive and on the third chromosome, was maintained with *TM6B* balancer.  
247 Analysis of meiotic recombination frequencies of an unmapped mutation with known markers is a  
248 classical technique that has been routinely employed to identify its cytogenetic position. In order to bring  
249 *l(3)tb* in a chromosome with such markers (*ru cu ca*), we allowed meiotic recombination to occur  
250 between *l(3)tb* and the 8 recessive markers present on the “*rucuca*” chromosome (**Table 2**). 113  
251 recombinant males were observed and recombination frequencies were calculated in centiMorgan (cM).  
252 **Table 3** shows the recombination frequencies of each marker (locus) with the mutation *l(3)tb*.  
253 Preliminary analysis suggested that *l(3)tb* was close to *thread* (*th*) with minimum recombination events  
254 between the two loci (2.65%). Further analysis of recombination events between *h-l(3)tb* [17.78%], *st-*  
255 *l(3)tb* [1.23%] and *cu-l(3)tb* [8.29%] (**Table 4**) and comparing with the positions of each of the markers,  
256 the mutation was estimated to be located left of *thread* (43.2 cM; band 72D1) between 41.71 cM–42.77  
257 cM, *i.e.*, in the cytological position 71F4-F5.  
258 Complementation analysis with molecularly defined Drosdel and Exelixis deficiency lines (N=85),  
259 spanning the entire chromosome 3, identified four lines which failed to complement the mutation, *viz.*,  
260 *Df(3L)BSC774*, *Df(3L)BSC575*, *Df(3L)BSC845* and *Df(3L)RM95*, which was generated in the lab using  
261 progenitor RS stocks. Trans-heterozygotes *l(3)tb/Df(3L)BSC575* were pupal lethal and the dying non-  
262 tubby larvae showed phenotypes similar to *l(3)tb* homozygotes, suggesting the mutation to reside between  
263 71F1 and 72A1 on the left arm of chromosome 3. Further analysis using six deletion lines belonging to  
264 the above region (71F1–72A2) identified the mutation to reside between 71F4 to 71F5, which strangely is  
265 a gene desert region. Complementation analyses performed with lethal insertion alleles (N=26) of genes  
266 residing proximal or distal to 71F4-F5 identified two lethal *P*-element insertion alleles of *DCP2* (mRNA  
267 decapping protein 2; CG6169), *viz.*, *P{GT1}DCP2<sup>BG01766</sup>* and *PBac{RB}DCP2<sup>e00034</sup>*, which failed to  
268 complement the mutation *l(3)tb* (**Figure 7A and C**) as well as those deletions which had failed to  
269 complement *l(3)tb*, implying the mutation to be allelic to *DCP2* (72A1).

270

271 **Trans-heterozygotes of *DCP2* mutants and *l(3)tb* show developmental delay, tumorous larval brain**  
272 **with elevated neuroblast numbers, larval/pupal lethality and developmental defects in escapee flies**

273 Trans-heterozygotes of *l(3)tb* with either allele of *DCP2*, *viz.*, *P{GT1}DCP2<sup>BG01766</sup>* and  
274 *PBac{RB}DCP2<sup>e00034</sup>*, showed developmental delay. In either case, trans-heterozygous third instar larvae  
275 showed persistence of larval stage till Day 10 ALH (**Figure 6B and D**), and show tumorous phenotypes  
276 of brain and wing imaginal discs (**Supplementary Figure S4**), similar to the *l(3)tb* homozygotes.  
277 Expression pattern of Deadpan (Dpn), a marker for neuroblasts show increased number of neuroblasts in  
278 the larval brain of the trans-heterozygotes as well as *l(3)tb* homozygotes (**Figure 7F, K and P**). Also, the  
279 trans-heterozygous progeny showed a higher mitotic index as compared to the wild type progeny, similar

280 to the *l(3)tb* homozygotes (**Figure 7G, L and P**). While *PBac{RB}DCP2<sup>e00034</sup>/l(3)tb* was found to be  
281 100% pupal lethal, *P{GTI}DCP2<sup>BG01766</sup>/l(3)tb* was only 81.6% lethal (**Figure 6A and B**), with the rest  
282 18.4% pupae eclosing as flies. However, the escapee flies showed several developmental abnormalities,  
283 *viz.*, defects in wing (9.5%), thorax closure (3.2%), loss of abdominal para-segments and abdominal  
284 bristles (3.2%), and presence of melanotic patches (22.2%), leg defects (41.3%) or eclosion defects  
285 (12.7%) (**Supplementary Figure S2**). Analysis of compound eyes in these escapees revealed complete  
286 loss of regular arrangement of ommatidia and ommatidial bristles (**Supplementary Figure S3**).  
287 Abnormal external genitalia were also observed in the male escapees (data not shown). Subsequent  
288 analysis of fertility showed that the trans-heterozygous escapee flies had compromised fertility with only  
289 40% of the males and 21.7% of the females being fertile (**Table 5**).

290 The similarity in the pattern of development and the defects associated with it between the *l(3)tb* trans-  
291 heterozygotes and homozygotes provide a strong genetic proof of allelism between *l(3)tb* and *DCP2*.

### 292 *DCP2<sup>l(3)tb</sup>* is an insertion allele of *DCP2*

293 Fine mapping, performed by overlapping PCR identified the region (**Supplementary Figure S5**),  
294 amplified by the primer pair, Dbo\_F, and DCP2\_P19\_R, to span the candidate region. The region, which  
295 is of 945 bp (3L: 15826279..15827223) in the wild type and comprises of the 5'UTR coding region of  
296 *DCP2*, the adjacent intergenic region and the proximal part of the neighboring gene, *dbo*, showed absence  
297 of amplification in the DNA of *l(3)tb* homozygotes, highlighting it as the candidate lesion. Long range  
298 PCR using the same pair of primers revealed a large amplicon of ~8.5 kb in the mutant against the 945 bp  
299 amplicon in the wild type genome, subjected to same thermal cycling parameters (**Figure 8B**).  
300 Amplification of the full length gene *DCP2* using primers residing outside the gene revealed a large  
301 amplicon of ~17kb from the mutant genome as against the 8.6 kb (3L: 15811576..15820204) wild type  
302 amplicon (**Figure 8A**). The pGEM-T-812 probe, which corresponds to the candidate region in the wild  
303 type, hybridized with all the amplicons implying the fidelity of amplification (**Figure 8A and B**). This  
304 was further corroborated by sequencing of the amplicon terminals (data not shown). On digesting wild  
305 type and mutant genomic DNA with enzymes *HindIII* and *BamHI* and subsequent hybridization with the  
306 pGEM-T-812 probe, completely different banding profiles were observed. While the *HindIII* digested  
307 DNA showed a band at ~ 2.1 kb in the wild type genome, the *l(3)tb* genome showed a single band at ~ 10  
308 kb, the size difference being almost in agreement with the banding profile exemplified by *BamHI* digested  
309 DNA, wherein, the wild type genome showed a band at ~ 10.2 kb and the mutant at ~ 18 kb (**Figure 8D**).  
310 These results imply the presence of an insertion at the candidate region in *DCP2*, in the *DCP2<sup>l(3)tb</sup>* genome  
311 and that *DCP2<sup>l(3)tb</sup>* is an insertion allele.

312 **The *DCP2*<sup>*l(3)tb*</sup> genome harbors Gypsy-LTR like sequence in 5'UTR coding region of *DCP2* and**  
313 **expansion of adjacent upstream intergenic AT-rich sequence**

314 In order to identify the functional genomics of mutations, it is essential to deduce the nucleotide sequence  
315 of the mutation, and thus, a convergent bi-directional primer-walk was initiated with the primer pair  
316 which identified the presence of insertion in *DCP2* in the *l(3)tb* genome. On sequencing, the *DCP2*-  
317 proximal end showed presence of wild type sequence till 3L: 15826410 after which a 444 bp AT-rich  
318 sequence was detected (**Supplementary Figure S6 B-1**), which did not show any resemblance with the  
319 wild type sequence present at the region whereas the *dbo*-proximal end showed complete wild type  
320 sequence profile (3L: 15827143..15826738) (**Supplementary Figure S6 B-2**). On homology search to  
321 identify the novel sequence obtained, the sequence showed homology with the Gypsy LTR sequence of  
322 *Drosophila*. On searching for *DCP2* promoters in the Eukaryotic Promoter Database, SIB and aligning  
323 the sequence coordinates of the 444 bp insertion, it was found that the insertion is downstream to the  
324 transcription start site (TSS) of *DCP2*, which is at 3L: 15826420. On designing a new pair of primers  
325 from the distal part of the reads obtained above, long range PCR was first performed with *DCP2*<sup>*l(3)tb*</sup> and  
326 wild type genomic DNA. Although no amplification was observed with the wild type DNA, the *DCP2*<sup>*l(3)tb*</sup>  
327 DNA showed amplicons of sizes ~7.2 kb, ~3 kb, ~2.8 kb and ~430 bp with the 430 bp amplicon showing  
328 the highest concentration as observed from the electrophoretogram (**Figure 9B**). This amplification  
329 profile resembled that of tandem repeat bearing regions. To confirm the repetitive nature of the sequence,  
330 Southern hybridisation was performed with the same electrophoretogram. The 430 bp amplicon was  
331 eluted from the gel, cloned in pGEM-T vector and used as a probe. The probe showed complete  
332 hybridization with all of the amplicons indicating the repetitive nature of the sequence present  
333 downstream (**Figure 9B**). Sequencing of the 430 bp amplicon revealed an AT-rich sequence. Homology  
334 search identified the sequence to be homologous to the distal part of the *DCP2* UTR and the adjacent  
335 intergenic sequence between *DCP2* and *dbo*, the coordinates being 3L: 15826407..15826716. After  
336 aligning the present set of reads with the previous set, a sequence duplication was observed for 5'-T-A-T-  
337 A-3', flanking the Gypsy-LTR insertion (**Supplementary Figure S6 B-3 and 4**). The present set of  
338 sequencing reads also confirmed that the LTR insertion (3L: 15826407..15826407) was indeed prior to  
339 the completion of the UTR (3L: 15826423). Copy number variation analyses of the intergenic sequence  
340 vs. the internal control through PCR in the wild type and the mutant *DCP2*<sup>*l(3)tb*</sup> showed a sharp increase in  
341 the amplicon concentration of the intergenic sequence in *DCP2*<sup>*l(3)tb*</sup> against the internal control as  
342 evidenced from the gel electrophoretogram (**Figure 9C**). Comparison of the fluorescent intensity of the  
343 bands (intra and inter-genotype) showed relatively high ratio of concentrations of the amplicon to the  
344 internal control (*Dsor*) amplicon as observed from the graphical analyses (**Figure 9D**). On the basis of the

345 results obtained from rough and fine mapping, the architecture of the mutant allele, *DCP2*<sup>l(3)tb</sup> is depicted  
346 in **Figure 9E**, which shows the bipartite nature of the mutation, viz., amplification of the intergenic  
347 sequence between *DCP2* and *Dbo* as well as an insertion of 444 bp *Gypsy* LTR-like sequence  
348 immediately downstream to the TSS of *DCP2*.

#### 349 ***DCP2*<sup>l(3)tb</sup> is a *DCP2* hypomorph alongwith low expression of the neighbouring gene, *Dbo***

350 Following the identification of the genomic architecture of the allele, it was imperative to determine the  
351 expression potential of the allele. Semi-quantitative RT-PCR analyses confirmed the hypomorphic nature  
352 of the allele wherein the mutant showed extremely low levels of expression of *DCP2* (**Figure 9F**). Since  
353 the intergenic region between *DCP2* and *Dbo* is upstream to either and bears an expansion, *Dbo* transcript  
354 titres were also examined wherein they showed extremely lowered expression (**Figure 9F**). At present, it  
355 is doubtful whether the lowered *Dbo* level is a cause or an effect of the mutation, since *Dbo*  
356 (*Smac/Diablo/Henji*) is a pro-apoptogenic molecule which the inhibitor of apoptotic proteins (IAP), and  
357 its lowered levels therefore serve as a prognostic marker of tumor progression in human carcinomas  
358 (Martinez-Ruiz et al, 2008). Again, *Dbo* expresses strongly in the neuronal tissues at the synapse (Wang  
359 et al, 2016) and its perturbation causes alteration in neuro-muscular function. Being a multi-faceted  
360 molecule, altered expression of the same may have some contribution to the tumourigenesis since the  
361 tumor primarily affects brain which is an integral part of the CNS.

#### 362 **Tumor caused by *DCP2* is hyperplastic with elevated Cyclins A and E**

363 Since the mutation showed all the hallmarks of classical tumor suppressors (Merz et. al., 1990), we  
364 endeavored to characterize the perturbations in cellular physiology caused in the wake of tumourigenesis.  
365 RT-PCR analyses depicted elevated levels of Cyclins E (G1/S phase cyclin) and A (G2/M phase cyclin),  
366 which are indicative of increased cell proliferation and rapid cell cycles (**Figure 10C**).  
367 Immunolocalisation studies confirmed the elevated expression of Cyclin E as well (**Figure 10A and B**).  
368 On observing closely, the regular arrangement of cells in the brain hemisphere and optic lobes in the wild  
369 type is severely disrupted in the mutant along with superfluous growth and increased number of mitotic  
370 nuclei. The enlarged brain lobes, increased number of mitotic nuclei and disruption of the regular  
371 arrangement of cells in the mutant, concomitant with elevated expression of cyclins A and E clearly imply  
372 the tumourous nature of the mutant.

373 When the tumorous brains (**Figure 10D**) and wing discs (**Figure 10E**) were examined for the expression  
374 of the polarity marker Discs large (*Dlg*), both tissues did not show appreciable loss of polarity. On a  
375 closer look, the wing discs at 138h AEL showed increase in cell number concomitant with decrease in cell

376 size (**Figure 10E-C**). At the same stage, the tumorous brain shows increased number of cells at in the  
377 optic lobe (**Figure 10D**). Usually, neoplastic tumours are metastatic and the tumour cells lose their  
378 polarity to acquire the mesenchymal-like fate, delaminate from the matrix and migrate (Miles et al, 2011).  
379 In contrast, hyperplastic tumours do not show appreciable loss of polarity even in later stages of  
380 tumorigenesis, since in these tumours the cells do not delaminate, but remain adhered to the original  
381 tissue matrix, but keep on dividing. The expression pattern of Dlg shows retention of polarity even at  
382 138h of development, which is an extremely late and delayed 3<sup>rd</sup> instar larval stage, which implies the  
383 tumour to be an over-proliferative, hyperplastic one. Again, this is well in agreement with the Cyclin E  
384 staining pattern, and taken together, they imply increased cell division, which essentially requires  
385 increased and rapid cell cycles.

### 386 **Global overexpression of *DCP2* rescues mutant phenotypes associated with *l(3)tb***

387 Global over-expression of *DCP2* using ubiquitous GAL4 drivers (*Act5C-GAL4* or *Tub-GAL4*) in the  
388 mutant homozygous *l(3)tb* individuals rescued the larval and pupal lethality. **Table 6** shows the genotype  
389 and fate of the progeny as scored from the rescue experiment. As can be seen, for over-expression of  
390 *DCP2* using *Act5C-GAL4*, out of 35.1% (N=155) non-tubby progeny (*l(3)tb* homozygous background),  
391 *i.e.*, *Act5C-GAL4/CyO* or *Sp; l(3)tb:UAS-DCP2/l(3)tb*, 21.3% (N=94) and 13.8% (N=61) segregated as  
392 curly (*Act5C-GAL4/CyO; l(3)tb:UAS-DCP2/l(3)tb*) and non-curly (or with sternopleural bristles: *Act5C-*  
393 *GAL4/Sp; l(3)tb:UAS-DCP2/l(3)tb*), respectively. Similarly, while over-expressing using *Tub-GAL4*, we  
394 obtained 37% (N=166) non-tubby progeny, *i.e.*, *UAS-DCP2/CyO* or *Sp; l(3)tb:Tub-GAL4/l(3)tb*, out of  
395 which, 17.2% (N=77) were curly (*UAS-DCP2/CyO; l(3)tb:Tub-GAL4/l(3)tb*) while 19.8% (N=89) were  
396 non-curly (*UAS-DCP2/ Sp; l(3)tb:Tub-GAL4/l(3)tb*).

397 In both the cases of overexpression, all non-tubby progeny pupated, devoid of any developmental  
398 anomalies reminiscent of *l(3)tb* mutation and emerged as flies. Thus, the rescue of the mutant phenotypes  
399 observed in *l(3)tb* homozygotes by global overexpression of *DCP2* iteratively substantiates the fact the  
400 *l(3)tb* is an allele of *DCP2* and that the tumour is caused solely owing to the loss of expression of *DCP2*.

### 401 **Summary and Conclusion**

402 In *Drosophila*, *DCP2* is the only decapping enzyme present and thus is extremely important for a number  
403 of growth processes throughout development. In other organisms as well, it is well conserved and has  
404 fundamentally important roles in development (Xu et al, 2006; Ma et al, 2013), DNA replication (Mullen  
405 and Marzluff, 2008; Schmidt et al, 2011), stress response (Hilgers et al, 2006; Xu and Chua, 2012),  
406 synapse plasticity (Hillebrand et al, 2010), retrotransposition (Dutko et al, 2010) and viral replication  
407 (Hopkins et al, 2013). In *Arabidopsis*, *DCP2* loss-of-function alleles show accumulation of capped

408 mRNA intermediates, lethality of seedlings and defects in post-embryonic development, with no leaves,  
409 stunted roots with swollen root hairs, chlorotic cotyledons and swollen hypocotyls (Goeres et al, 2007;  
410 Iwasaki et al, 2007; Xu et al, 2006). In humans as well, chromosomal deletions of 5q21-22, the region  
411 harboring *DCP2* is frequently observed in lung cancers (Hosoe et al, 1994; Mendes-da-Silva et al, 2000),  
412 colorectal cancer (Delattre et al, 1989) and oral squamous cell carcinoma (Mao et al, 1998). Hence, *DCP2*  
413 has an unexplored role in development and/or cell cycle progression across phyla, which needs to be  
414 investigated. Since the physiology of an organism is tightly regulated by the optimized titres of gene  
415 expression programs, a global loss of *DCP2* may lead to perturbed mRNA titres which in turn may alter  
416 the cellular response to such dismal conditions and eventually lead to drastic physiological disorders such  
417 as tumourigenesis. Although we are unsure of the exact mechanism(s) by which a loss of *DCP2* leads to  
418 tumourigenesis, our findings in the novel allele, *DCP2<sup>l(3)hb</sup>*, propose an absolutely novel role of *DCP2* in  
419 tumourigenesis and identify *DCP2* as a candidate for future explorations of tumourigenesis.

#### 420 **Acknowledgements**

421 The authors acknowledge Prof. L. S. Shashidhara, IISER Pune, India and Prof. Volker Hartenstein,  
422 University of California, USA for sharing the Anti-Armadillo and Anti-Deadpan antibodies, respectively.  
423 We sincerely acknowledge Prof. Rajiva Raman and Dr. Rachana Nagar of our lab for assistance in fine  
424 mapping of the mutation and in analyses and interpretation of the results obtained therein. We duly  
425 acknowledge the National Facility for Laser Scanning Confocal Microscopy, UGC-CAS, DST-FIST of  
426 Department of Zoology, Banaras Hindu University and DST-PURSE, UGC-UPE to the Institute. We  
427 sincerely thank Department of Science and Technology (DST) for financial support to JKR.

428

#### 429 **Conflict of Interest**

430 The authors declare no conflict of interest.

#### 431 **Funding**

432 Financial support from DST, New Delhi is duly acknowledged.

#### 433 **Ethical Approval**

434 All studies were performed as per ethical guidelines. All applicable international, national and  
435 institutional guidelines for the care and use of *Drosophila* were followed.

436

437 **References**

- 438 Banerjee, A. and Roy, J.K., 2018. Bantam regulates the axonal geometry of *Drosophila* larval brain by  
439 modulating actin regulator enabled. *Invertebrate Neuroscience*, 18(2), p.7.  
440
- 441 Coller, J. and Parker, R., 2004. Eukaryotic mRNA decapping. *Annual review of biochemistry*, 73(1),  
442 pp.861-890.  
443
- 444 Cooley, L., Kelley, R. and Spradling, A., 1988. Insertional mutagenesis of the *Drosophila* genome with  
445 single P elements. *Science*, 239(4844), pp.1121-1128.  
446
- 447 Delattre, O., Law, D.J., Remvikos, Y., Sastre, X., Feinberg, A.P., Olschwang, S., Melot, T., Salmon, R.J.,  
448 Validire, P. and Thomas, G., 1989. Multiple genetic alterations in distal and proximal colorectal cancer.  
449 *The Lancet*, 334(8659), pp.353-356.  
450
- 451 Dunckley, T. and Parker, R., 1999. The DCP2 protein is required for mRNA decapping in *Saccharomyces*  
452 *cerevisiae* and contains a functional MutT motif. *The EMBO journal*, 18(19), pp.5411-5422.  
453
- 454 Dutko, J.A., Kenny, A.E., Gamache, E.R. and Curcio, M.J., 2010. 5' to 3' mRNA decay factors colocalize  
455 with Ty1 gag and human APOBEC3G and promote Ty1 retrotransposition. *Journal of virology*, 84(10),  
456 pp.5052-5066.  
457
- 458 Gateff, E. and Schneiderman, H.A., 1969. Neoplasms in mutant and cultured wild-type tissues of  
459 *Drosophila*. *National Cancer Institute Monograph*, 31, pp.365-397.  
460
- 461 Gateff, E., 1978. Malignant neoplasms of genetic origin in *Drosophila melanogaster*. *Science*, 200(4349),  
462 pp.1448-1459.  
463
- 464 Gateff, E., 1994. Tumor suppressor and overgrowth suppressor genes of *Drosophila melanogaster*:  
465 developmental aspects. *International Journal of Developmental Biology*, 38, pp.565-565.  
466
- 467 Goeres, D.C., Van Norman, J.M., Zhang, W., Fauver, N.A., Spencer, M.L. and Sieburth, L.E., 2007.  
468 Components of the *Arabidopsis* mRNA decapping complex are required for early seedling development.  
469 *The Plant Cell*, 19(5), pp.1549-1564.  
470
- 471 Hilgers, V., Teixeira, D. and Parker, R., 2006. Translation-independent inhibition of mRNA  
472 deadenylation during stress in *Saccharomyces cerevisiae*. *Rna*, 12(10), pp.1835-1845.  
473
- 474 Hillebrand, J., Pan, K., Kokaram, A., Barbee, S., Parker, R. and Ramaswami, M., 2010. The Me31B  
475 DEAD-box helicase localizes to postsynaptic foci and regulates expression of a CaMKII reporter mRNA  
476 in dendrites of *Drosophila* olfactory projection neurons. *Frontiers in neural circuits*, 4, p.121.  
477
- 478 Hopkins, K.C., McLane, L.M., Maqbool, T., Panda, D., Gordesky-Gold, B. and Cherry, S., 2013. A  
479 genome-wide RNAi screen reveals that mRNA decapping restricts bunyaviral replication by limiting the  
480 pools of Dcp2-accessible targets for cap-snatching. *Genes & development*, 27(13), pp.1511-1525.  
481
- 482 Hosoe, S., Ueno, K., Shigedo, Y., Tachibana, I., Osaki, T., Kumagai, T., Tanio, Y., Kawase, I.,  
483 Nakamura, Y. and Kishimoto, T., 1994. A frequent deletion of chromosome 5q21 in advanced small cell  
484 and non-small cell carcinoma of the lung. *Cancer research*, 54(7), pp.1787-1790.  
485

486 Ivanov, A.I., Young, C., Den Beste, K., Capaldo, C.T., Humbert, P.O., Brennwald, P., Parkos, C.A. and  
487 Nusrat, A., 2010. Tumor suppressor scribble regulates assembly of tight junctions in the intestinal  
488 epithelium. *The American journal of pathology*, 176(1), pp.134-145.  
489  
490 Iwasaki, S., Takeda, A., Motose, H. and Watanabe, Y., 2007. Characterization of *Arabidopsis* decapping  
491 proteins AtDCP1 and AtDCP2, which are essential for post-embryonic development. *FEBS letters*,  
492 581(13), pp.2455-2459.  
493  
494 LaGrandeur, T.E. and Parker, R., 1998. Isolation and characterization of Dcp1p, the yeast mRNA  
495 decapping enzyme. *The EMBO journal*, 17(5), pp.1487-1496.  
496  
497 Liebl, F.L., Werner, K.M., Sheng, Q., Karr, J.E., McCabe, B.D. and Featherstone, D.E., 2006.  
498 Genome-wide P-element screen for *Drosophila* synaptogenesis mutants. *Journal of neurobiology*, 66(4),  
499 pp.332-347.  
500  
501 Lindsley, D.L. and Zimm, G.G., 1992. The genome of *Drosophila melanogaster*, p.1100.  
502  
503 Lukacsovich, T., Asztalos, Z., Awano, W., Baba, K., Kondo, S., Niwa, S. and Yamamoto, D., 2001. Dual-  
504 tagging gene trap of novel genes in *Drosophila melanogaster*. *Genetics*, 157(2), pp.727-742.  
505  
506 Ma, J., Flemer, M., Strnad, H., Svoboda, P. and Schultz, R.M., 2013. Maternally recruited DCP1A and  
507 DCP2 contribute to messenger RNA degradation during oocyte maturation and genome activation in  
508 mouse. *Biology of reproduction*, 88(1), pp.11-1.  
509  
510 Mao, E.J., Schwartz, S.M., Daling, J.R. and Beckmann, A.M., 1998. Loss of heterozygosity at 5q 21–22  
511 (adenomatous polyposis coli gene region) in oral squamous cell carcinoma is common and correlated with  
512 advanced disease. *Journal of oral pathology & medicine*, 27(7), pp.297-302.  
513  
514 Martinez-Ruiz, G., Maldonado, V., Ceballos-Cancino, G., Grajeda, J.P.R. and Melendez-Zajgla, J., 2008.  
515 Role of Smac/DIABLO in cancer progression. *Journal of experimental & clinical cancer research*, 27(1),  
516 p.48.  
517  
518 Mechler, B.M., 1994. When the control is lacking—the role of tumour suppressor genes in cancer  
519 development. *J Biosci*, 19(5), pp.537-556.  
520  
521 Mendes-da-Silva, P., Moreira, A., Duro-da-Costa, J., Matias, D. and Monteiro, C., 2000. Frequent loss of  
522 heterozygosity on chromosome 5 in non-small cell lung carcinoma. *Molecular pathology*, 53(4), p.184.  
523  
524 Merz, R., Schmidt, M., Török, I., Protin, U., Schuler, G., Walther, H.P., Krieg, F., Gross, M., Strand, D.  
525 and Mechler, B.M., 1990. Molecular action of the 1 (2) gl tumor suppressor gene of *Drosophila*  
526 *melanogaster*. *Environmental health perspectives*, 88, pp.163-167.  
527  
528 Mitchell, P. and Tollervey, D., 2001. mRNA turnover. *Current opinion in cell biology*, 13(3), pp.320-325.  
529  
530 Mullen, T.E. and Marzluff, W.F., 2008. Degradation of histone mRNA requires oligouridylation followed  
531 by decapping and simultaneous degradation of the mRNA both 5' to 3' and 3' to 5'. *Genes & development*,  
532 22(1), pp.50-65.  
533  
534 Papagiannouli, F. and Mechler, B.M., 2013. Modeling tumorigenesis in *Drosophila*: current advances and  
535 future perspectives. *Future Aspects of Tumor Suppressor Genes": InTech publications*, pp.97-128.  
536



- 537 Parker, R. and Song, H., 2004. The enzymes and control of eukaryotic mRNA turnover. *Nature structural*  
538 *& molecular biology*, 11(2), pp.121-127.
- 539
- 540 Raghavan, A. and Bohjanen, P.R., 2004. Microarray-based analyses of mRNA decay in the regulation of  
541 mammalian gene expression. *Briefings in Functional Genomics*, 3(2), pp.112-124.
- 542
- 543 Russell, D.W. and Sambrook, J., 2001. *Molecular cloning: a laboratory manual* (Vol. 1, p. 112). Cold  
544 Spring Harbor, NY: Cold Spring Harbor Laboratory.
- 545
- 546 Sambrook, J., Fritsch, E.F. and Maniatis, T., 1989. *Molecular cloning: a laboratory manual* (No. Ed. 2).  
547 Cold spring harbor laboratory press.
- 548
- 549 Schmidt, M.J., West, S. and Norbury, C.J., 2011. The human cytoplasmic RNA terminal U-transferase  
550 ZCCHC11 targets histone mRNAs for degradation. *Rna*, 17(1), pp.39-44.
- 551
- 552 She, M., Decker, C.J., Svergun, D.I., Round, A., Chen, N., Muhlrud, D., Parker, R. and Song, H., 2008.  
553 Structural basis of dcp2 recognition and activation by dcp1. *Molecular cell*, 29(3), pp.337-349.
- 554
- 555 Song, M.G., Li, Y. and Kiledjian, M., 2010. Multiple mRNA decapping enzymes in mammalian cells.  
556 *Molecular cell*, 40(3), pp.423-432.
- 557
- 558 Thibault, S.T., Singer, M.A., Miyazaki, W.Y., Milash, B., Dompe, N.A., Singh, C.M., Buchholz, R.,  
559 Demsky, M., Fawcett, R., Francis-Lang, H.L. and Ryner, L., 2004. A complementary transposon tool kit  
560 for *Drosophila melanogaster* using P and piggyBac. *Nature genetics*, 36(3), pp.283-287.
- 561
- 562 Tipping, M. and Perrimon, N., 2014. *Drosophila* as a model for context-dependent tumorigenesis.  
563 *Journal of cellular physiology*, 229(1), pp.27-33.
- 564
- 565 Wang, M., Chen, P.Y., Wang, C.H., Lai, T.T., Tsai, P.I., Cheng, Y.J., Kao, H.H. and Chien, C.T., 2016.  
566 Dbo/Henji modulates synaptic dPAK to gate glutamate receptor abundance and postsynaptic response.  
567 *PLoS genetics*, 12(10).
- 568
- 569 Wang, Z., Jiao, X., Carr-Schmid, A. and Kiledjian, M., 2002. The hDcp2 protein is a mammalian mRNA  
570 decapping enzyme. *Proceedings of the National Academy of Sciences*, 99(20), pp.12663-12668.
- 571
- 572 Xu, J. and Chua, N.H., 2012. Dehydration stress activates *Arabidopsis* MPK6 to signal DCP1  
573 phosphorylation. *The EMBO journal*, 31(8), pp.1975-1984.

## Figures

### **A forward genetic approach to mapping a *P*-element second site mutation identifies *DCP2* as a novel tumor suppressor in *Drosophila melanogaster***

Rohit Kunar<sup>1a</sup>, Rakesh Mishra<sup>1a</sup>, Lolitika Mandal<sup>2</sup>, Debasmita P. Alone<sup>3</sup>, Shanti Chandrasekharan<sup>4</sup> and Jagat Kumar Roy<sup>1\*</sup>

<sup>1</sup>Cytogenetics Laboratory, Department of Zoology, Institute of Science, Banaras Hindu University, Varanasi–221005, Uttar Pradesh, India

<sup>2</sup>Department of Biological Sciences, Indian Institute of Science Education and Research (IISER) Mohali, Manauli–140306, India

<sup>3</sup>School of Biological Sciences, National Institute of Science Education and Research (NISER) PO Bhipur-Padanpur, Pin–752050, Odisha, India

<sup>4</sup>Division of Genetics, Indian Agricultural Research Institute (IARI), Pusa, New Delhi, Delhi–110012, India

<sup>a</sup> Both authors contributed equally to the work

Email ID of authors –

Rohit Kunar: [rohit.kunar3@bhu.ac.in](mailto:rohit.kunar3@bhu.ac.in)  
Rakesh Mishra: [shivrakesh@gmail.com](mailto:shivrakesh@gmail.com)  
Lolitika Mandal: [lolitika@iisermohali.ac.in](mailto:lolitika@iisermohali.ac.in)  
Debasmita P Alone: [debasmita@niser.ac.in](mailto:debasmita@niser.ac.in)  
Shanti Chandrasekharan: [shanty@iari.res.in](mailto:shanty@iari.res.in)  
Jagat Kumar Roy: [jkroy@bhu.ac.in](mailto:jkroy@bhu.ac.in)

#### **\*Address for Correspondence –**

Cytogenetics Laboratory, Department of Zoology,  
Institute of Science, Banaras Hindu University,  
Varanasi – 221005, Uttar Pradesh, India.  
Phone: +91-542-236-8145 Fax: +91-542-236-8457  
E-mail: [jkroy@bhu.ac.in](mailto:jkroy@bhu.ac.in)

**Running title – *Drosophila DCP2* is a tumour suppressor**

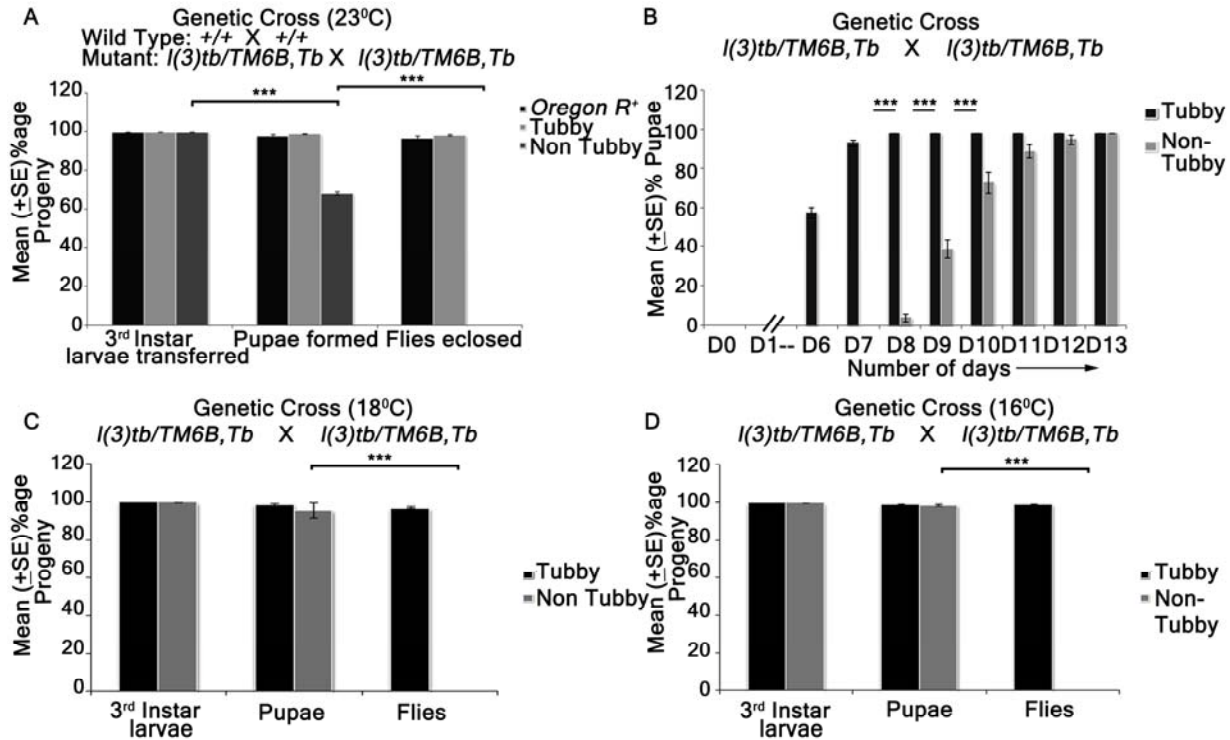

**Figure 1.** Homozygous  $l(3)tb$  show delayed larval development with lethality at larval/pupal stage (A, B) and is not a conditional temperature sensitive allele (A, B, C). Homozygous  $l(3)tb$  progeny, at 23°C, showed lethality at larval and pupal stages and no flies eclosed as compared to wild type and heterozygous  $l(3)tb$  progeny with balancer chromosome (A). Homozygous  $l(3)tb$  progeny individuals demonstrated extended larval life up to day 12/13 where as heterozygous progeny individuals followed the normal wild type pattern of development (B). (C) and (D) show significant increase in viability of homozygous (non-tubby)  $l(3)tb$  larvae at lowered temperatures of 18°C and 16°C respectively, though there also occurred absolute lethality at pupal stages. Each bar represents mean ( $\pm$ S.E.) of three replicates of 100 larvae in each. \*\*\* indicates  $p < 0.005$  \*\*\* indicates  $p < 0.005$ .

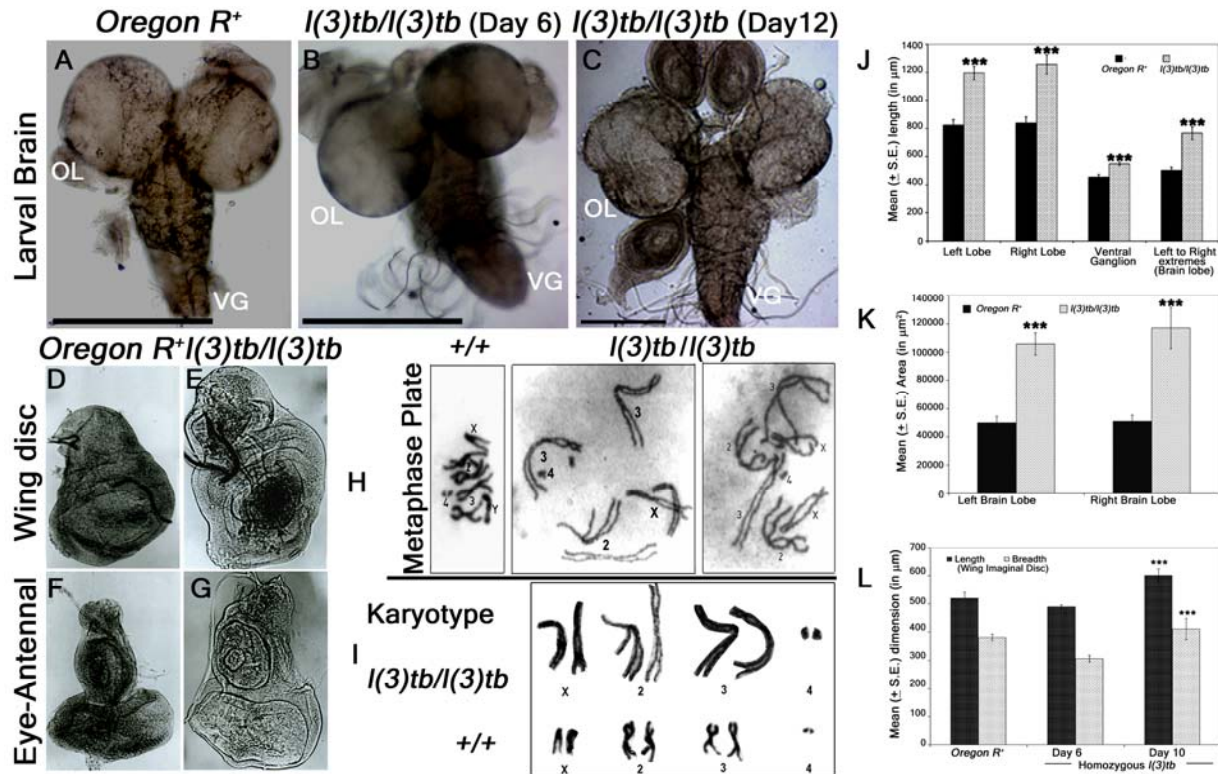

**Figure 2.** Homozygous *l(3)tb* mutants show severe morphological alteration in delayed 3<sup>rd</sup> instar larval brain, wing and eye-antennal disc of. Homozygous *l(3)tb* mutant 3<sup>rd</sup> instar larvae revealed tumorous brain of day 12 (C) as compared to day 6 of homozygous mutant (B) and day 5 of wild type, *Oregon R<sup>+</sup>* (A). *l(3)tb* homozygotes exhibited highly significant differences in the overall circumference of the left and right brain lobes in the delayed stage (day 10) as compared to the respective wild type brain lobes (J). Significant differences were found in the area ( $\mu\text{m}^2$ ) of respective brain lobes of *l(3)tb* homozygotes and wild type (K). Dimension of wing and eye-antennal imaginal discs of delayed 3<sup>rd</sup> instar larvae from homozygous *l(3)tb* mutant revealed significant increase in size (D,E,F,G). Length and breadth of wing discs from 3<sup>rd</sup> instar larvae of *l(3)tb* mutant of day 6, was found to be smaller than the wing imaginal discs from wild type, but wing discs from extended larval period (day 10) showed significant increase in the size (L). Metaphase chromosome preparation of brain cells (H) from wild type and *l(3)tb* homozygotes exhibited abnormal karyotypes (I) where *l(3)tb* homozygotes showed less condensed and extended chromosome morphology as compared to wild type, *Oregon R<sup>+</sup>*. \*\*\* denotes  $p < 0.005$

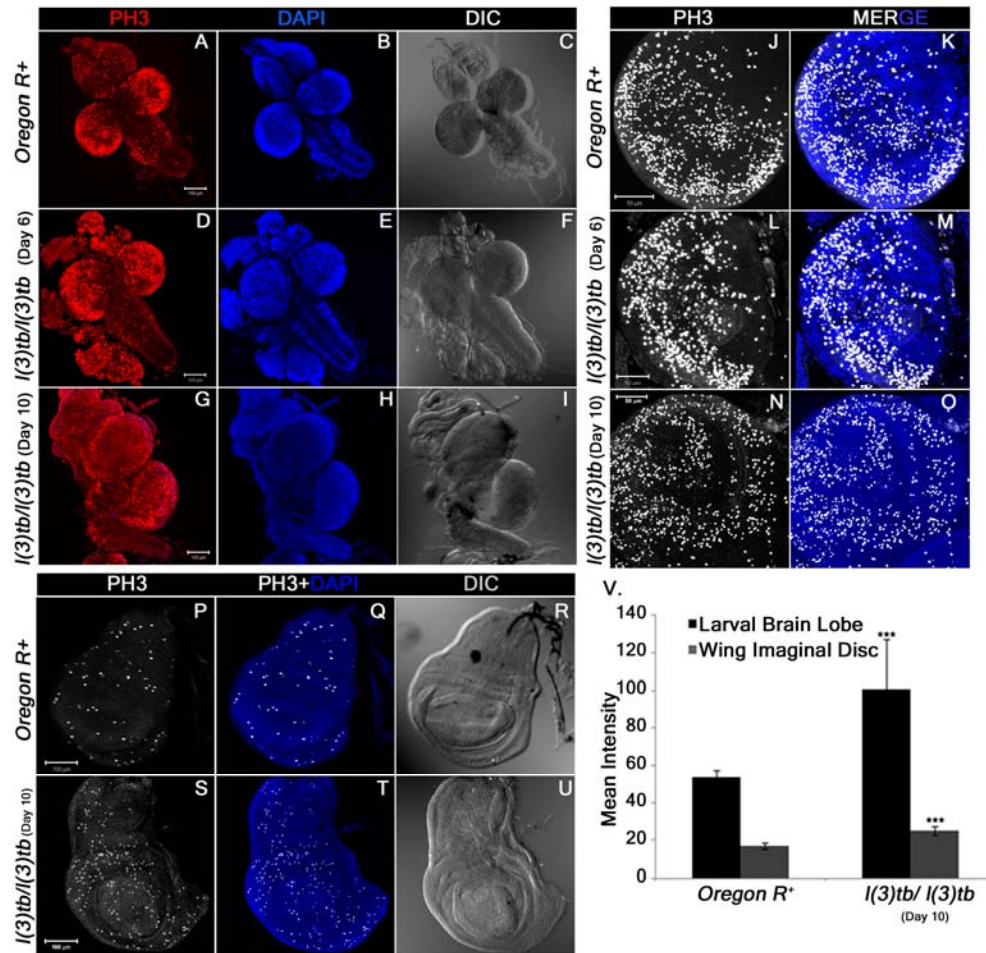

**Figure 3.** Enhanced mitotic potential observed in the tumorous tissues of homozygous *l(3)tb* as shown in larval whole brain (A), brain lobes (D, G) and wing imaginal discs (S) immunostained with phosphor-histone 3 (PH3), a potent mitotic marker. Distribution of PH3 labeled cells counter stained with DAPI cells in wild type (A) and homozygous *l(3)tb* (Day 6 and Day 10) larval brain (D, G) and also in wild type brain lobes (B, C) and homozygous mutant brain lobes (E, F for day 6; H, I for day 10) indicated high mitotic index as compared to wild type. Similarly, more mitotic positive cells were seen in tumorous wing imaginal discs (day 10) of homozygous mutant *l(3)tb* (S) as compared to wild type, *Oregon R+* (P). DIC images (C, F, I and R, U) illustrates external normal morphology in wild type and more pronounced tumorous phenotypes in homozygous *l(3)tb* larval brain and wing imaginal discs. Quantitative analysis showed increase in the number of mitotic positive cells in homozygous mutant larval brain lobes and wing imaginal discs as compared to wild type and difference was highly significant (V). The images are projections of optical sections acquired by confocal microscopy. Staining was done in triplicates with 10 brains and 15 wing imaginal discs in each group. Significant difference is represented as \*\*\*  $P \leq 0.005$  using one-way ANOVA.

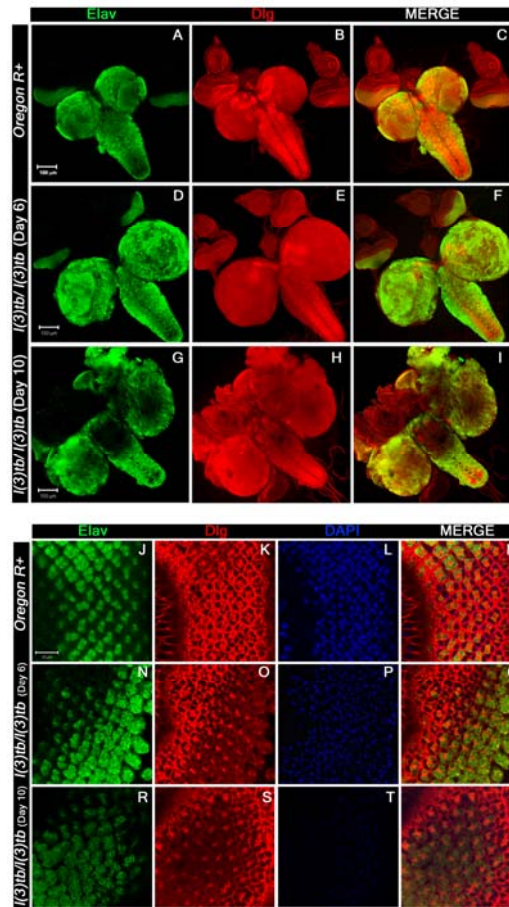

**Figure 4.** Confocal photomicrographs show loss of mature neurons and increase in junctional protein, Dlg, in delayed (Day 10) homozygous *l(3)tb*. 3<sup>rd</sup> instar larval brain shows intense staining of Elav (green) in day 6 (D) of homozygous mutant later on show loss of staining in enlarged brain of day 10 (G), while the wild type brain (A) showed normal pattern of Elav staining. Dlg stained the ventral nerve chord and central brain in optic lobes of wild type (B), which is similar in day 6 of homozygous mutant brain (E) but in delayed larval brain, day 10, the pattern was altered (H). Scale shown is 100 $\mu$ m. Neuronal tissue from eye imaginal discs also display loss of neurons seen through Elav staining in day 10 (R) as compared to day 6 (N) in homozygous *l(3)tb* mutant as well as to wild type (J). Pattern of junctional protein, Dlg, in eye imaginal discs is also altered in day 10 (S) as compared to day 6 (O) and wild type (K). Counter stain with DAPI shows very weak intensity in day 10 (T) reflecting disintegrating chromatin as compared to day 6 (P) and wild type (L). Scale bar represents 10 $\mu$ m.

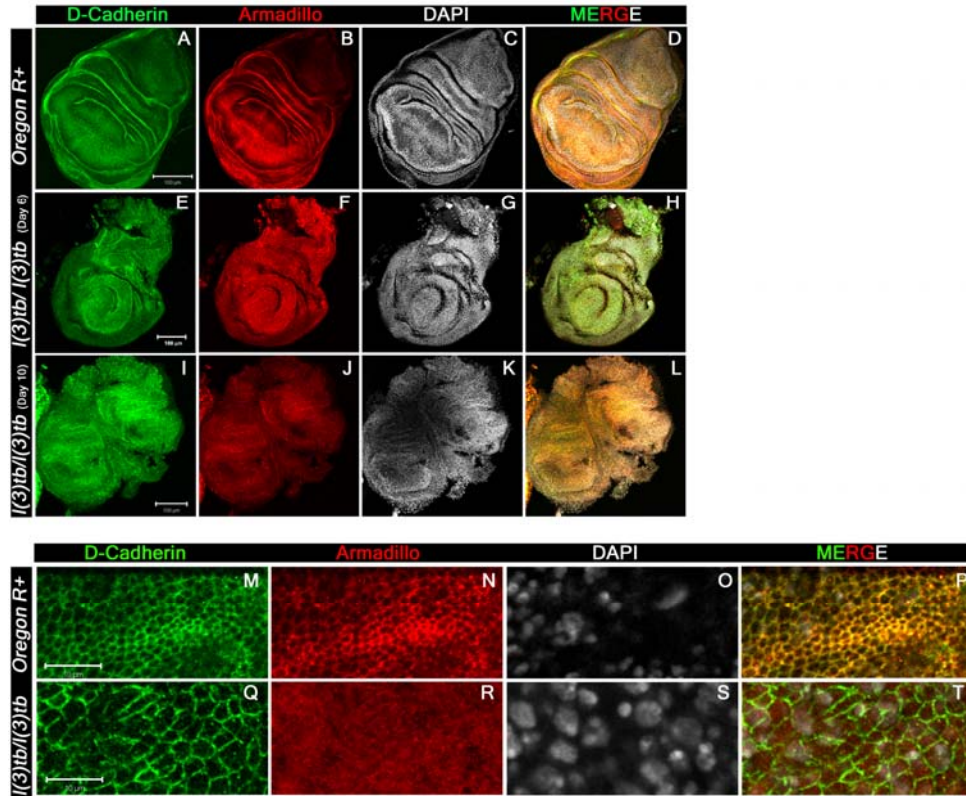

**Figure 5.** Confocal images of 3<sup>rd</sup> instar larval wing imaginal discs immunolabeled to visualize the altered distribution pattern of cadherin-catenin complex proteins. Tumor caused in the homozygous *l(3)tb* mutant completely altered the distribution pattern of both, trans-membranous protein DE-cadherin (A, E, I, M, Q) and Armadillo ( $\beta$ -Catenin, B, F, J, N, R) adheren junctional proteins. Alteration of both proteins is more pronounced in the wing imaginal discs from mutant larva during extended larval life (I, J) than in the early wing imaginal disc (E, F) as compared to distinct pattern of DE-cadherin (A) and Armadillo (B) in the wild type wing imaginal discs. Armadillo is a binding partner of trans-membranous protein DE-cadherin having roles in cell adhesion and regulate tissue organization and morphogenesis. Merged images also substantiate the altered distribution of both junctional proteins in the homozygous mutant (H, L) as compared to the wild type (D) where co-localization is indicated by yellow pattern. Higher magnification of wing imaginal disc (pouch region) demonstrate altered distribution pattern of DE-cadherin (Q) and Armadillo (R) in homozygous *l(3)tb* mutant as compared to wild type (N, R). Increase in cell size seen in homozygous *l(3)tb* mutant (Q) as compared to wild type (M). Complete loss of Arm staining observed in homozygous *l(3)tb*(R) whereas normal pattern seen in wild type wing disc (N). Chromatin size also altered in homozygous *l(3)tb* (S) as compared to wild type (O). Wild type shows clear co-localization of D-Cad and Arm (P), while there is complete loss of co-localization in homozygous *l(3)tb* wing imaginal discs (T). Scale bar represents 100  $\mu$ m (A to L) and 10  $\mu$ m (M to T).

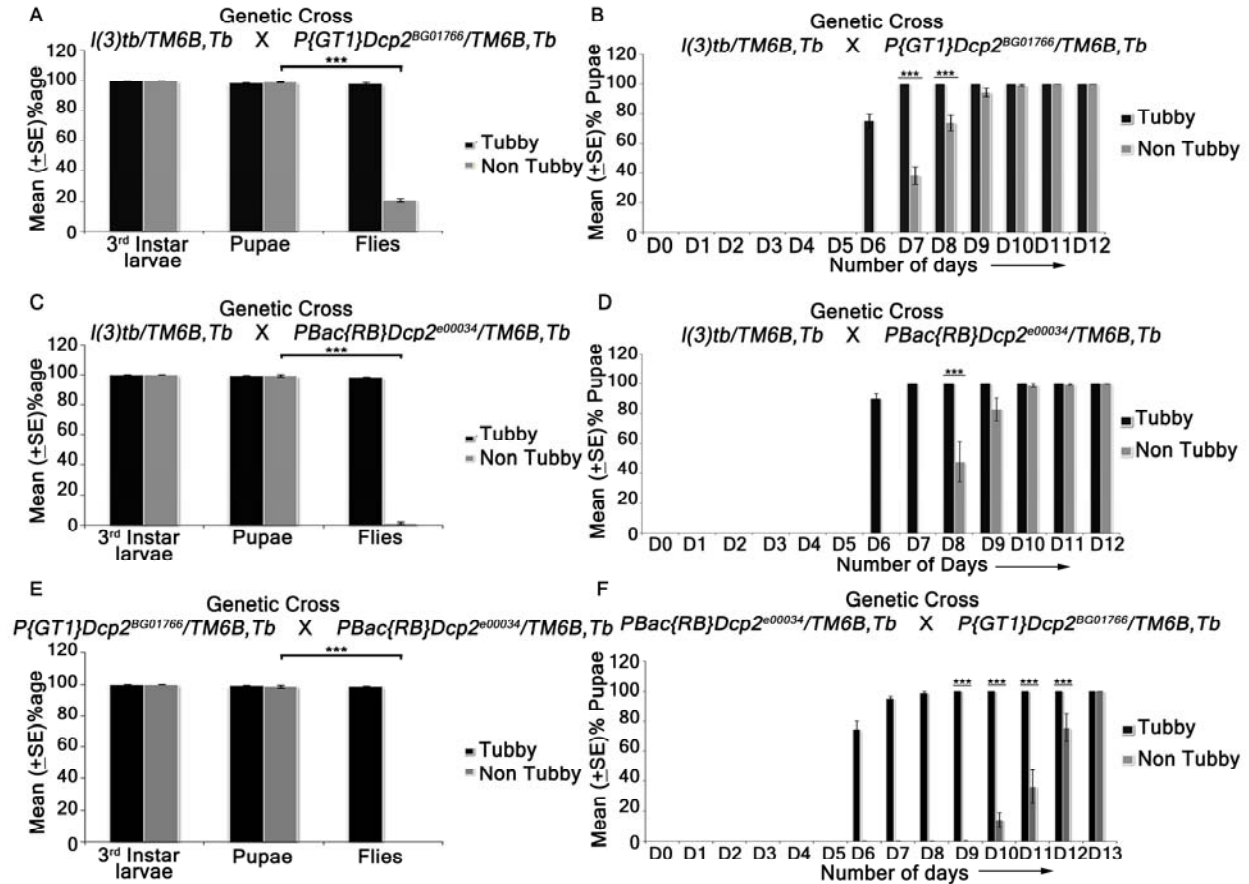

**Figure 6.** Viability assay performed on various hetero-allelic combinations between alleles of gene *DCP2* and the mutation in *l(3)tb*. Homozygous *l(3)tb* exhibited larval as well as pupal lethality. 69% of homozygous larvae pupated whereas no fly eclosed from the pupae. *l(3)tb* trans-heterozygous with *P\{GT1\}DCP2<sup>BG01766</sup>* showed only 18.4% fly eclosed (A). *l(3)tb/PBac\{RB\}DCP2<sup>e00034</sup>* trans-heterozygote (C) causes 100% lethality at pupal stage. Trans-allelic combination *P\{GT1\}DCP2<sup>BG01766</sup>/PBac\{RB\}DCP2<sup>e00034</sup>* (E) also exhibited 100% pupal lethality. Developmental delay seen in trans-heterozygotes *l(3)tb/P\{GT1\}DCP2<sup>BG01766</sup>* (B) and *l(3)tb/PBac\{RB\}DCP2<sup>e00034</sup>* (D) as in homozygous *l(3)tb*. Progeny from heterozygous for both the alleles of *DCP2* gene, *PBac\{RB\}DCP2<sup>e00034</sup>/P\{GT1\}DCP2<sup>BG01766</sup>* (F) also exhibited developmental delay. \*\*\* indicates  $p < 0.005$ .



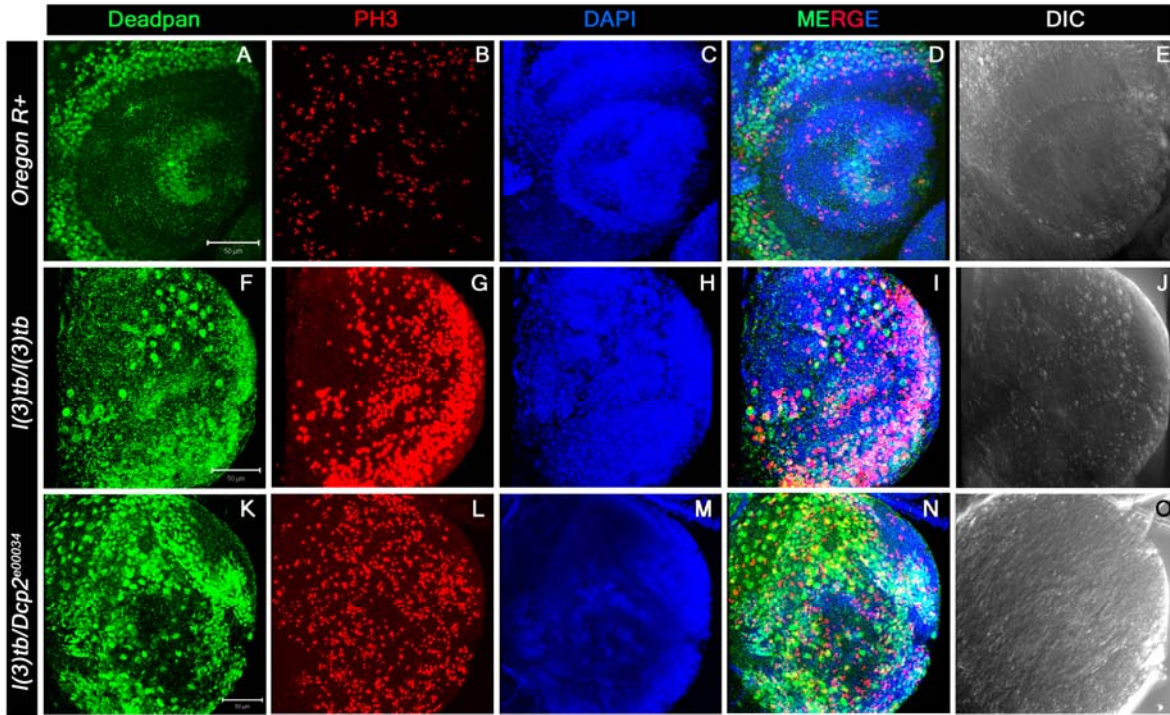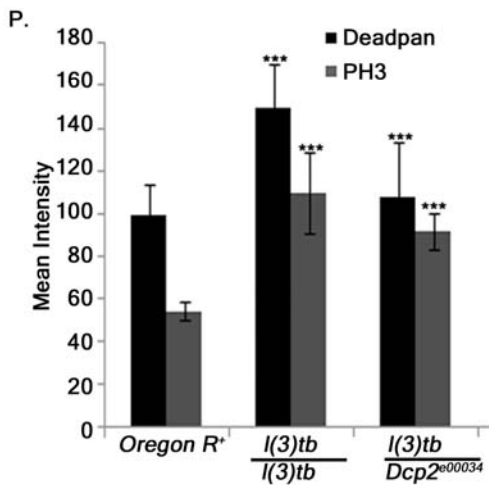

**Figure 7.** Heterozygous combination of *l(3)tb* with *Dcp2<sup>e00034</sup>* allele resulted in to significant increase in the number of neuroblasts and mitotically active cells. Confocal projection sections showing immunolocalisation of Deadpan, a neuroblast marker (Green, A, F, K) for picking neuroblasts and phosphohistone 3 (PH3, red, B, G, L) marking the mitotic cells are shown. Enhanced neuroblast population in homozygous mutant (F) and in heterozygous *l(3)tb* with *Dcp2<sup>e00034</sup>* allele (K) Similarly, increased number of mitotic cells (PH3 positive) also occurred in heterozygous *l(3)tb* with *Dcp2<sup>e00034</sup>* allele (L), similar to homozygous *l(3)tb* mutant (G). NBs and mitotic positive cells are quantified (P) and the differences are statistically significant when compared with wild type. \*\*\*  $P > 0.005$ . Scale bar indicates 50 $\mu$ m.

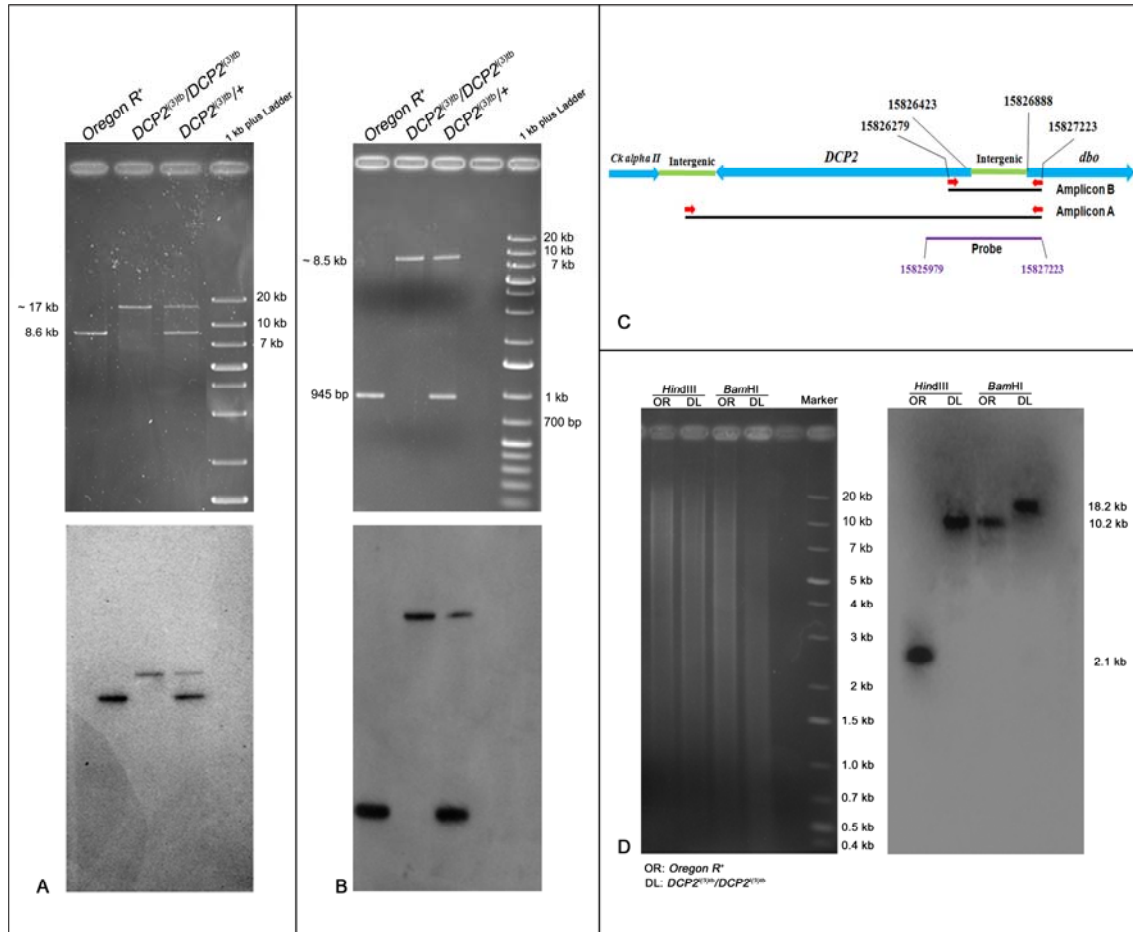

**Figure 8.** Gel electrophoretogram showing the PCR analysis of the full-length *DCP2* (A) and candidate region (B) in the wild type, mutant and the heterozygote. The schematic in C shows the gene arrangement along the chromosome along with the important coordinates. The primers are indicated by red arrows. For amplification of the full – length gene, the wild type amplicon is of 8.6 kb while the mutant amplicon is sized ~17 kb (A, upper half), whereas the wild type amplicon for the candidate region is of 945 bp while the mutant amplicon is sized ~8.5 kb (B, upper half). The heterozygote harbors both the alleles (wild type and mutant) and thus shows both the amplicons. The lower half in both A and B shows the the blot of the same probed with the pGEM-T-812 probe which spans the candidate mutated region in *DCP2* and is represented by the purple line. D shows the gel electrophoretogram and Southern blot of *DCP2* in the wild type and mutant genome. *Hind*III digested genomic DNA showed banding at ~ 2.1 kb in the wild type genome as against ~ 10 kb in the mutant genome, the size difference being almost in agreement with the banding profile exemplified by *Bam*HI digestion, with the wild type genome hybridizing at ~ 10.2 kb and the mutant at ~ 18 kb.

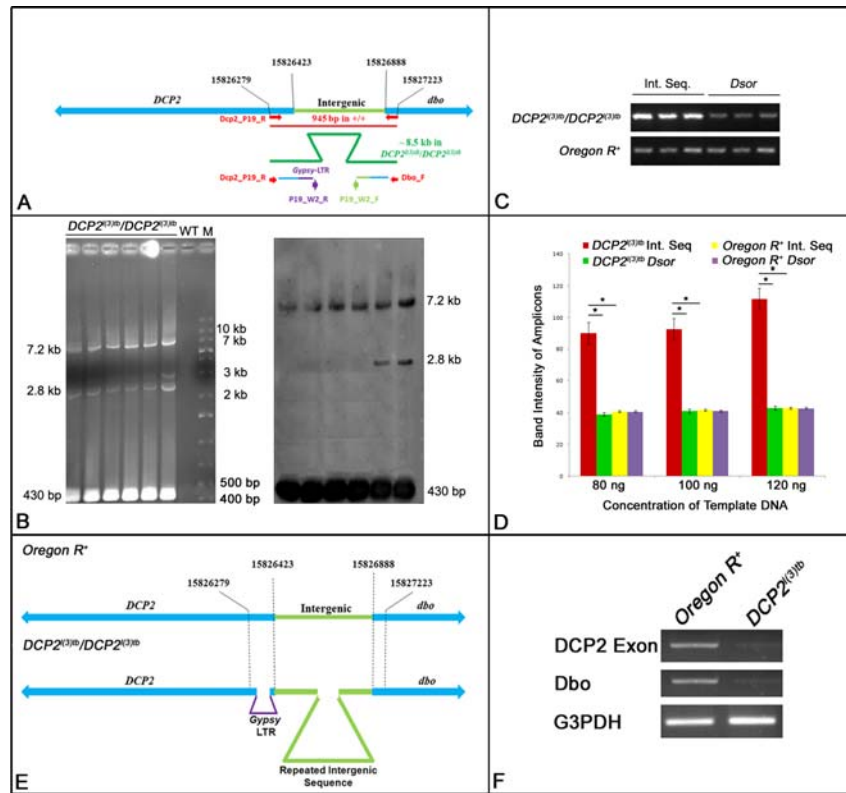

**Figure 9.** Gel electrophoretogram showing PCR amplification profile obtained by the primers used (P19\_W2\_R and P19\_W2\_F) for the “second step” of walking (B). The alignments of the sequences uncovered in the “first step” are shown as thin lines colored as per homology with the wild type sequence. The region amplified here lies subsequent to the sequence uncovered by the initial primers (A; Dbo\_F and Dcp2\_P19\_R, shown in red arrows). Mentioned alongside the electrophoretogram are the semi-logarithmic estimates of the amplicon size. Shown alongside is the blot of the same hybridized with the probe generated from the ~430 bp amplicon. Semi-quantitative PCR to detect change in copy number of the intergenic region in the *DCP2<sup>(3)tb</sup>* genome (C) shows increased amplification of the intergenic sequence in *DCP2<sup>(3)tb</sup>* genome as compared to the *Dsor* (control) amplicons in both the genomes. Shown in D is a histogram comparing the fluorescence intensity of PCR amplicons obtained from amplification of the intergenic sequence and the control sequence from the *DCP2<sup>(3)tb</sup>* genome and the wild type genome. The schematic in E shows the architecture of the mutant allele, *DCP2<sup>(3)tb</sup>* based on the results obtained from fine mapping. Semi-quantitative RT-PCR analyses of transcription from *DCP2* and *Dbo* in the wild type and *DCP2<sup>(3)tb</sup>* homozygotes (F) shows decreased titre of mRNA from both genes in the tumorous individuals.

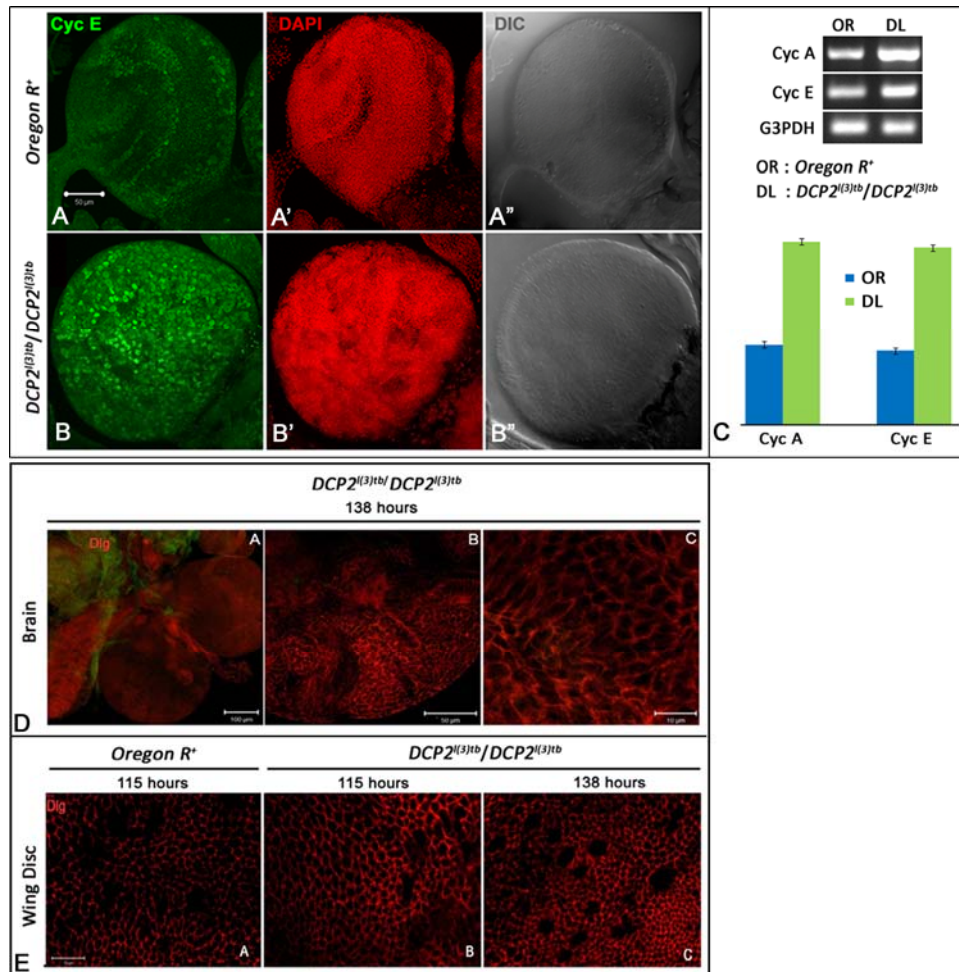

**Figure 10.** Immunolocalisation of Cyclin E shows elevated expression in the tumorous larval brains of *DCP2<sup>l(3)tb</sup>* homozygotes (B) as compared to the wild type (A). Semi-quantitative analyses of mRNA expression of Cyclins A and E show similar elevation in the brain of *DCP2<sup>l(3)tb</sup>* homozygotes (C). Expression of Discs-large in the brain (D) and wing discs (E) of the tumorous individuals did not show appreciable loss. At 138h AEL, the wing discs showed increase in cell number concomitant with decrease in cell size (E.C) whereas, at the same stage, the tumorous brain shows increased number of cells at in the optic lobe (D).

1 **Tables**

2 **A forward genetic approach to mapping a *P*-element second site mutation identifies *DCP2* as a**  
3 **novel tumor suppressor in *Drosophila melanogaster***

4 Rohit Kunar<sup>1a</sup>, Rakesh Mishra<sup>1a</sup>, Lolitika Mandal<sup>2</sup>, Debasmita P. Alone<sup>3</sup>, Shanti Chandrasekharan<sup>4</sup> and  
5 Jagat Kumar Roy<sup>1\*</sup>

6 <sup>1</sup>Cytogenetics Laboratory, Department of Zoology, Institute of Science, Banaras Hindu University,  
7 Varanasi–221005, Uttar Pradesh, India

8 <sup>2</sup>Department of Biological Sciences, Indian Institute of Science Education and Research (IISER) Mohali,  
9 Manauli–140306, India

10 <sup>3</sup>School of Biological Sciences, National Institute of Science Education and Research (NISER) PO  
11 Bhimpur-Padanpur, Pin–752050, Odisha, India

12 <sup>4</sup>Division of Genetics, Indian Agricultural Research Institute (IARI), Pusa, New Delhi, Delhi–110012,  
13 India

14  
15 <sup>a</sup> Both authors contributed equally to the work

16  
17 Email ID of authors –

18 Rohit Kunar: [rohit.kunar3@bhu.ac.in](mailto:rohit.kunar3@bhu.ac.in)  
19 Rakesh Mishra: [shivrakesh@gmail.com](mailto:shivrakesh@gmail.com)  
20 Lolitika Mandal: [lolitika@iisermohali.ac.in](mailto:lolitika@iisermohali.ac.in)  
21 Debasmita P Alone: [debasmita@niser.ac.in](mailto:debasmita@niser.ac.in)  
22 Shanti Chandrasekharan: [shanty@iari.res.in](mailto:shanty@iari.res.in)  
23 Jagat Kumar Roy: [jkroy@bhu.ac.in](mailto:jkroy@bhu.ac.in)

24  
25 **\*Address for Correspondence –**

26 Cytogenetics Laboratory, Department of Zoology,  
27 Institute of Science, Banaras Hindu University,  
28 Varanasi – 221005, Uttar Pradesh, India.  
29 Phone: +91-542-236-8145 Fax: +91-542-236-8457  
30 E-mail: [jkroy@bhu.ac.in](mailto:jkroy@bhu.ac.in)

31  
32 **Running title – *Drosophila DCP2* is a tumour suppressor**

33 **Table 1. Homozygous mutation in *l(3)tb* causes larval and pupal lethality.**

| <b>Genetic cross<br/>(23<sup>0</sup>C<sub>+1</sub>)</b> | <b>Total<br/>Eggs</b> | <b>No. of eggs<br/>hatched</b> | <b>3<sup>rd</sup> Instar<br/>larvae<br/>transferred</b> | <b>Pupae<br/>formed</b>               | <b>Flies<br/>eclosed</b>              |
|---------------------------------------------------------|-----------------------|--------------------------------|---------------------------------------------------------|---------------------------------------|---------------------------------------|
| <b><i>l(3)tb/TM6B</i><br/>X<br/><i>l(3)tb/TM6B</i></b>  | 1500                  | 972<br>(O= 64.8%)<br>(E=66.7%) | Non-Tubby-<br>468<br>(O=48.1%)<br>(E= 50%)              | Non-tubby<br>313<br>(O=66.8%)         | Non Tubby<br>0                        |
|                                                         |                       |                                | Tubby<br>473<br>(O= 48.6%)<br>(E=50%)                   | Tubby<br>468<br>(O=98.9%)<br>(E=100%) | Tubby<br>465<br>(O=99.4%)<br>(E=100%) |

34 Numbers in parenthesis indicate the percentage observed (O) and expected (E) values out of the total  
35 progeny from previous stage.

36

37 **Table 2. Rearranged genotypes of 113 males after various recombination events between all the**  
 38 **eight visible markers of *rucuca* chromosome**

| S.No.        | Genotypes |          |           |           |           |           |          |           | No. of Flies | Status of <i>l(3)tb</i> locus        |
|--------------|-----------|----------|-----------|-----------|-----------|-----------|----------|-----------|--------------|--------------------------------------|
| 1.           | <i>ru</i> | <i>h</i> | <i>th</i> | +         | +         | +         | +        | +         | 1            | 1 <i>l</i> <sup>+</sup>              |
| 2.           | <i>ru</i> | <i>h</i> | <i>th</i> | <i>st</i> | +         | +         | +        | +         | 1            | 1 <i>l</i> <sup>+</sup>              |
| 3.           | <i>ru</i> | <i>h</i> | <i>th</i> | <i>st</i> | <i>cu</i> | +         | +        | +         | 1            | 1 <i>l</i> <sup>+</sup>              |
| 4.           | <i>ru</i> | <i>h</i> | <i>th</i> | <i>st</i> | <i>cu</i> | <i>sr</i> | +        | +         | 1            | 1 <i>l</i> <sup>+</sup>              |
| 5.           | <i>ru</i> | <i>h</i> | <i>th</i> | <i>st</i> | <i>cu</i> | <i>sr</i> | <i>e</i> | +         | 3            | 3 <i>l</i> <sup>+</sup>              |
| 6.           | <i>ru</i> | <i>h</i> | <i>th</i> | <i>st</i> | <i>cu</i> | <i>sr</i> | <i>e</i> | <i>ca</i> | 6            | 6 <i>l</i> <sup>+</sup>              |
| 7.           | +         | <i>h</i> | <i>th</i> | <i>st</i> | <i>cu</i> | <i>sr</i> | <i>e</i> | <i>ca</i> | 6            | 6 <i>l</i> <sup>+</sup>              |
| 8.           | +         | +        | <i>th</i> | <i>st</i> | <i>cu</i> | <i>sr</i> | <i>e</i> | <i>ca</i> | 6            | 6 <i>l</i> <sup>+</sup>              |
| 9.           | +         | +        | +         | <i>st</i> | <i>cu</i> | <i>sr</i> | <i>e</i> | <i>ca</i> | 1            | 1 <i>l</i>                           |
| 10.          | +         | +        | +         | +         | <i>cu</i> | <i>sr</i> | <i>e</i> | <i>ca</i> | 2            | 1 <i>l</i>   1 <i>l</i> <sup>+</sup> |
| 11.          | +         | +        | +         | +         | +         | <i>sr</i> | <i>e</i> | <i>ca</i> | 2            | 2 <i>l</i>                           |
| 12.          | +         | +        | +         | +         | +         | +         | <i>e</i> | <i>ca</i> | 4            | 4 <i>l</i>                           |
| 13.          | +         | +        | +         | +         | +         | +         | +        | <i>ca</i> | 6            | 6 <i>l</i>                           |
| 14.          | +         | +        | +         | +         | +         | +         | +        | +         | 26           | 26 <i>l</i>                          |
| 15.          | <i>ru</i> | <i>h</i> | +         | +         | +         | +         | +        | +         | 6            | 6 <i>l</i>                           |
| 16.          | <i>ru</i> | +        | +         | +         | +         | +         | +        | +         | 6            | 6 <i>l</i>                           |
| 17.          | <i>ru</i> | +        | +         | +         | +         | +         | +        | <i>ca</i> | 3            | 3 <i>l</i>                           |
| 18.          | <i>ru</i> | +        | +         | +         | +         | +         | <i>e</i> | <i>ca</i> | 1            | 1 <i>l</i>                           |
| 19.          | <i>ru</i> | <i>h</i> | +         | +         | +         | +         | +        | <i>ca</i> | 7            | 7 <i>l</i>                           |
| 20.          | <i>ru</i> | <i>h</i> | +         | +         | +         | <i>sr</i> | <i>e</i> | <i>ca</i> | 5            | 5 <i>l</i>                           |
| 21.          | <i>ru</i> | +        | +         | +         | +         | <i>sr</i> | <i>e</i> | <i>ca</i> | 3            | 3 <i>l</i>                           |
| 22.          | <i>ru</i> | <i>h</i> | +         | +         | <i>cu</i> | <i>sr</i> | <i>e</i> | <i>ca</i> | 1            | 1 <i>l</i>                           |
| 23.          | <i>ru</i> | <i>h</i> | <i>th</i> | <i>st</i> | <i>cu</i> | +         | <i>e</i> | <i>ca</i> | 1            | 1 <i>l</i> <sup>+</sup>              |
| 24.          | +         | +        | <i>th</i> | <i>st</i> | <i>cu</i> | <i>sr</i> | +        | <i>ca</i> | 1            | 1 <i>l</i> <sup>+</sup>              |
| 25.          | +         | +        | <i>th</i> | <i>st</i> | <i>cu</i> | <i>sr</i> | <i>e</i> | +         | 3            | 3 <i>l</i> <sup>+</sup>              |
| 26.          | +         | +        | <i>th</i> | <i>st</i> | +         | +         | +        | +         | 1            | 1 <i>l</i> <sup>+</sup>              |
| 27.          | +         | +        | +         | +         | +         | <i>sr</i> | <i>e</i> | +         | 1            | 1 <i>l</i> <sup>+</sup>              |
| 28.          | +         | <i>h</i> | +         | +         | +         | +         | +        | +         | 1            | 1 <i>l</i> <sup>+</sup>              |
| 29.          | +         | <i>h</i> | <i>th</i> | <i>st</i> | <i>cu</i> | <i>sr</i> | <i>e</i> | +         | 5            | 4 <i>l</i> <sup>+</sup>   1 <i>l</i> |
| 30.          | +         | <i>h</i> | <i>th</i> | <i>st</i> | <i>cu</i> | <i>sr</i> | +        | +         | 1            | 1 <i>l</i> <sup>+</sup>              |
| 31.          | +         | <i>h</i> | <i>th</i> | <i>st</i> | <i>cu</i> | +         | +        | +         | 1            | 1 <i>l</i> <sup>+</sup>              |
| <b>Total</b> |           |          |           |           |           |           |          |           | <b>113</b>   |                                      |

39

40

41 **Table 3. Recombination frequencies (RF) between various recessive markers on *rucuca***  
 42 **chromosomes (*roughoid*, *hairy*, *thread*, *scarlet*, *curled*, *stripe*, *ebony*, and *claret*) and *l(3)tb***

| Sl. No. | Association of marker with <i>l(3)tb</i> | Flies                                              |                   |                                                    |                  | Recombination frequency (RF)<br>$\frac{R}{P+R} \times 100$ |
|---------|------------------------------------------|----------------------------------------------------|-------------------|----------------------------------------------------|------------------|------------------------------------------------------------|
|         |                                          | Parental (P)                                       |                   | Recombinant (R)                                    |                  |                                                            |
|         |                                          | Genotype                                           | No. of flies      | Genotype                                           | No. of flies     |                                                            |
| 1.      | <i>ru - l</i>                            | <i>ru<sup>+</sup> l</i><br><i>ru l<sup>+</sup></i> | 18<br>} 62<br>44  | <i>ru<sup>+</sup> l<sup>+</sup></i><br><i>ru l</i> | 18<br>} 51<br>33 | 45.13                                                      |
| 2.      | <i>h - l</i>                             | <i>h<sup>+</sup> l</i><br><i>h l<sup>+</sup></i>   | 54<br>} 79<br>25  | <i>h<sup>+</sup> l<sup>+</sup></i><br><i>h l</i>   | 12<br>} 34<br>22 | 30.08                                                      |
| 3.      | <i>th - l</i>                            | <i>th<sup>+</sup> l</i><br><i>th l<sup>+</sup></i> | 74<br>} 110<br>36 | <i>th<sup>+</sup> l<sup>+</sup></i><br><i>th l</i> | 1<br>} 3<br>2    | 2.65                                                       |
| 4.      | <i>st - l</i>                            | <i>st<sup>+</sup> l</i><br><i>st l<sup>+</sup></i> | 73<br>} 108<br>35 | <i>st<sup>+</sup> l<sup>+</sup></i><br><i>st l</i> | 2<br>} 5<br>3    | 4.42                                                       |
| 5.      | <i>cu - l</i>                            | <i>cu<sup>+</sup> l</i><br><i>cu l<sup>+</sup></i> | 71<br>} 105<br>34 | <i>cu<sup>+</sup> l<sup>+</sup></i><br><i>cu l</i> | 3<br>} 8<br>5    | 7.07                                                       |
| 6.      | <i>sr - l</i>                            | <i>sr<sup>+</sup> l</i><br><i>sr l<sup>+</sup></i> | 62<br>} 94<br>32  | <i>sr<sup>+</sup> l<sup>+</sup></i><br><i>sr l</i> | 4<br>} 19<br>15  | 16.8                                                       |
| 7.      | <i>e - l</i>                             | <i>e<sup>+</sup> l</i><br><i>e l<sup>+</sup></i>   | 56<br>} 86<br>30  | <i>e<sup>+</sup> l<sup>+</sup></i><br><i>e l</i>   | 7<br>} 27<br>20  | 23.89                                                      |
| 8.      | <i>ca - l</i>                            | <i>ca<sup>+</sup> l</i><br><i>ca l<sup>+</sup></i> | 42<br>} 74<br>32  | <i>ca<sup>+</sup> l<sup>+</sup></i><br><i>ca l</i> | 16<br>} 49<br>33 | 43.3                                                       |



44

45 **Table 4. Recombination events between *h-l*, *st-l* and *cu-l***

| S.No. | Association of marker with <i>l(3)tb</i> | Flies                   |              |                                     |              | Recombination frequency<br>$\frac{R}{P+R} \times 100$ |
|-------|------------------------------------------|-------------------------|--------------|-------------------------------------|--------------|-------------------------------------------------------|
|       |                                          | Parentals (P)           |              | Recombinants (R)                    |              |                                                       |
|       |                                          | Genotype                | No. of flies | Genotype                            | No. of flies |                                                       |
| 1.    | <i>h - l</i>                             | <i>h<sup>+</sup> l</i>  | 89           | <i>h<sup>+</sup> l<sup>+</sup></i>  | 18           | 17.78                                                 |
|       |                                          | <i>h l<sup>+</sup></i>  | 96           | <i>h l</i>                          | 22           |                                                       |
|       |                                          |                         | 185          |                                     | 40           |                                                       |
| 2.    | <i>st - l</i>                            | <i>st<sup>+</sup> l</i> | 252          | <i>th<sup>+</sup> l<sup>+</sup></i> | 2            | 1.23                                                  |
|       |                                          | <i>st l<sup>+</sup></i> | 238          | <i>th l</i>                         | 4            |                                                       |
|       |                                          |                         | 480          |                                     | 6            |                                                       |
| 3.    | <i>cu - l</i>                            | <i>cu<sup>+</sup> l</i> | 269          | <i>ru<sup>+</sup> l<sup>+</sup></i> | 22           | 8.29                                                  |
|       |                                          | <i>cu l<sup>+</sup></i> | 283          | <i>ru l</i>                         | 28           |                                                       |
|       |                                          |                         | 552          |                                     | 50           |                                                       |

46

47

48 **Table 5. Fertility assay of trans-heterozygotes  $P\{GT1\}DCP2^{BG01766}/l(3)tb$  demonstrating male and**  
49 **female sterility**

| <b>Cross</b>                    | $l(3)tb/P\{GT1\}DCP2^{BG01766}$         | $l(3)tb/P\{GT1\}DCP2^{BG01766}$         |
|---------------------------------|-----------------------------------------|-----------------------------------------|
|                                 | (males)<br>X<br>+/+<br>(Virgin females) | (Virgin females)<br>X<br>+/+<br>(males) |
| <b>Total No. of Pair Mating</b> | 70                                      | 83                                      |
| <b>Fertile</b>                  | 28 (40%)                                | 18 (21.7%)                              |
| <b>Sterile</b>                  | 42 (60%)                                | 55 (66.3%)                              |

50

51

52 **Table 6 Global overexpression of *DCP2* rescues the mutant phenotypes exhibited by *l(3)tb***  
 53 **homozygotes**

| Genetic Crosses |                                                                                          | <i>Act5C-GAL4/CyO; +/+</i>                 |       | <i>+/+; Tub-GAL4/TM6B</i>                  |       | <i>Act5C-GAL4/CyO; l(3)tb/TM6B</i>                      |              | <i>UAS-DCP2/CyO; l(3)tb/TM6B</i>                        |              |
|-----------------|------------------------------------------------------------------------------------------|--------------------------------------------|-------|--------------------------------------------|-------|---------------------------------------------------------|--------------|---------------------------------------------------------|--------------|
|                 |                                                                                          | <i>Act5C GAL4/CyO; +/+</i>                 |       | <i>+/+; Tub GAL4/TM6B</i>                  |       | <i>Sp/CyO; l(3)tb: UAS-DCP2/TM6B</i>                    |              | <i>Sp/CyO; l(3)tb: Tub GAL4/TM6B</i>                    |              |
|                 |                                                                                          | Homozygotes die as embryos or early larvae |       | Homozygotes die as embryos or early larvae |       | CyO and TM6B homozygotes die as embryos or early larvae |              | CyO and TM6B homozygotes die as embryos or early larvae |              |
| 01.             | Eggs                                                                                     | <b>750</b>                                 |       | <b>790</b>                                 |       | <b>1050</b>                                             |              | <b>1245</b>                                             |              |
| 02.             | Unfertilised Eggs                                                                        | 39                                         | 5.2%  | 37                                         | 4.7%  | 68                                                      | 6.5%         | 86                                                      | 6.9%         |
| 03.             | Fertilised Eggs                                                                          | 711                                        | 94.8% | 753                                        | 95.3% | 982                                                     | 93.5%        | 1159                                                    | 93.1%        |
| 04.             | Dead Embryos                                                                             | 304                                        | 42.8% | 357                                        | 47.4% | 434                                                     | 44.2%        | 525                                                     | 45.3%        |
| 05.             | Dead 1 <sup>st</sup> and 2 <sup>nd</sup> instar Larvae                                   | 8                                          | 1.12% | 19                                         | 2.52% | 34                                                      | 3.46%        | 57                                                      | 4.92%        |
| 06.             | Dead 3 <sup>rd</sup> instar larvae                                                       | 2                                          | 0.28% | 5                                          | 0.66% | 72                                                      | 7.33%        | 128                                                     | 11.04%       |
| 07.             | Pupae                                                                                    | <b>397</b>                                 | 55.8% | <b>372</b>                                 | 49.4% | <b>442</b>                                              | 45.0%        | <b>449</b>                                              | 38.7%        |
| 08.             | Dead Pupae                                                                               | 17                                         | 4.3%  | 11                                         | 2.9%  | 21                                                      | 4.8%         | 23                                                      | 5.1%         |
| 09.             | Eclosion following over-expression of <i>DCP2</i> in homozygous <i>l(3)tb</i> background | -                                          | -     | -                                          | -     | <i>Act5C-GAL4/CyO; l(3)tb:UAS-DCP2/l(3)tb</i>           |              | <i>UAS-DCP2/CyO; l(3)tb: Tub-GAL4/l(3)tb</i>            |              |
|                 |                                                                                          |                                            |       |                                            |       | 94                                                      | <b>21.3%</b> | 77                                                      | <b>17.2%</b> |
|                 |                                                                                          | -                                          | -     | -                                          | -     | <i>Act5C-GAL4/Sp; l(3)tb:UAS-DCP2/l(3)tb</i>            |              | <i>UAS-DCP2/Sp; l(3)tb: Tub-GAL4/l(3)tb</i>             |              |
|                 |                                                                                          |                                            |       |                                            |       | 61                                                      | <b>13.8%</b> | 89                                                      | <b>19.8%</b> |

54

55

1 **Supplementary Figures**

2 **A forward genetic approach to mapping a *P*-element second site mutation identifies *DCP2* as a**  
3 **novel tumor suppressor in *Drosophila melanogaster***

4 Rohit Kunar<sup>1a</sup>, Rakesh Mishra<sup>1a</sup>, Lolitika Mandal<sup>2</sup>, Debasmita P. Alone<sup>3</sup>, Shanti Chandrasekharan<sup>4</sup> and  
5 Jagat Kumar Roy<sup>1\*</sup>

6 <sup>1</sup>Cytogenetics Laboratory, Department of Zoology, Institute of Science, Banaras Hindu University,  
7 Varanasi–221005, Uttar Pradesh, India

8 <sup>2</sup>Department of Biological Sciences, Indian Institute of Science Education and Research (IISER) Mohali,  
9 Manauli–140306, India

10 <sup>3</sup>School of Biological Sciences, National Institute of Science Education and Research (NISER) PO  
11 Bhimpur-Padanpur, Pin–752050, Odisha, India

12 <sup>4</sup>Division of Genetics, Indian Agricultural Research Institute (IARI), Pusa, New Delhi, Delhi–110012,  
13 India

14  
15 <sup>a</sup> Both authors contributed equally to the work

16  
17 Email ID of authors –

18 Rohit Kunar: [rohit.kunar3@bhu.ac.in](mailto:rohit.kunar3@bhu.ac.in)  
19 Rakesh Mishra: [shivrakesh@gmail.com](mailto:shivrakesh@gmail.com)  
20 Lolitika Mandal: [lolitika@iisermohali.ac.in](mailto:lolitika@iisermohali.ac.in)  
21 Debasmita P Alone: [debasmita@niser.ac.in](mailto:debasmita@niser.ac.in)  
22 Shanti Chandrasekharan: [shanty@iari.res.in](mailto:shanty@iari.res.in)  
23 Jagat Kumar Roy: [jkroy@bhu.ac.in](mailto:jkroy@bhu.ac.in)

24  
25 **\*Address for Correspondence –**

26 Cytogenetics Laboratory, Department of Zoology,  
27 Institute of Science, Banaras Hindu University,  
28 Varanasi – 221005, Uttar Pradesh, India.  
29 Phone: +91-542-236-8145 Fax: +91-542-236-8457  
30 E-mail: [jkroy@bhu.ac.in](mailto:jkroy@bhu.ac.in)

31  
32 **Running title – *Drosophila DCP2* is a tumour suppressor**

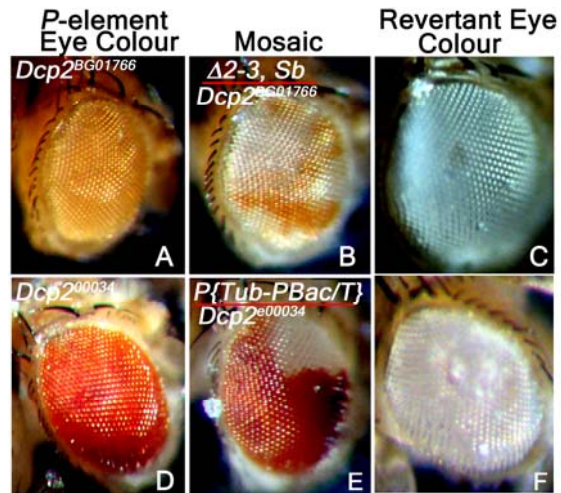

33

34

35 **Figure S1** Reversion analysis by the excision of *piggyBac* transposon in  $DCP2^{e00034}$  with the help of  
36 *piggyBac* specific transposase source, *CyO*,  $P\{Tub-Pbac\}2/Wg^{SP-1}$  and similarly by the excision of *P*-  
37 element in  $DCP2^{BG01766}$  strain using  $\Delta 2-3, Sb/TM6B$ ,  $Tb^l$ , *Hu*,  $e^l$  transposase source as ‘jumpstarter stock’.  
38  $DCP2$  revertant white eyed F2 flies were crossed to  $l(3)tb$  and lethal progenies scored.

39

40

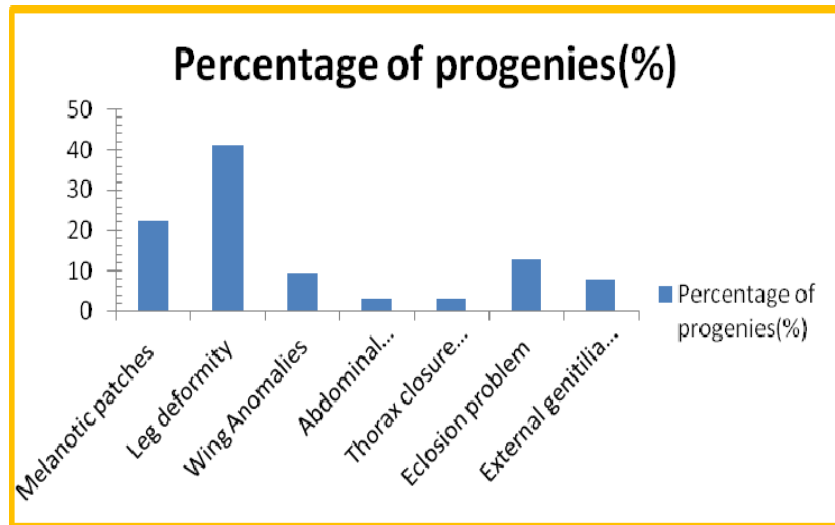

41

42 **Figure S2.** Morphological defects exhibited by escapees of adult fly trans-heterozygous for  
43 *P{GT1}DCP2<sup>BG01766</sup>/l(3)tb*. The phenotype includes melanotic patches (22.2%) on the cuticular  
44 exoskeleton, abnormalities in leg (41.3%), wing (10%), abdomen (3.2%) and thorax (3.2%). Many of the  
45 trans-heterozygous progeny was observed to have eclosion problem (12.7%) and males have abnormal  
46 genitalia (9.7%).

47

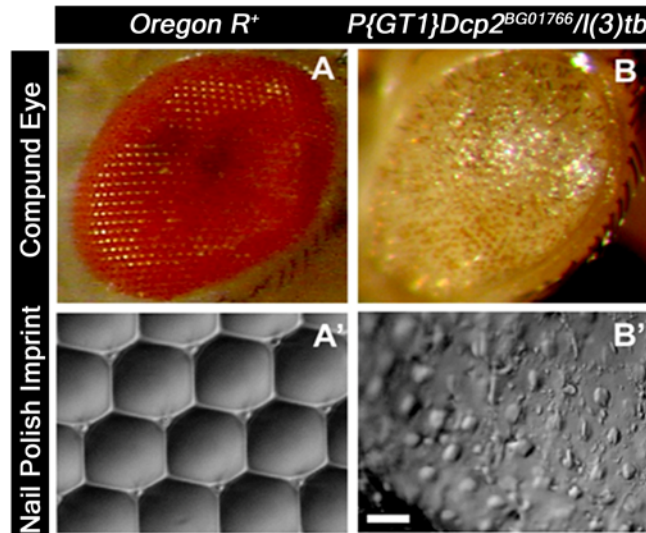

48

49 **Figure S3. Pronouncement of severe defects in compound eyes of the escapees having heterozygous**  
50 **genetic background of the mutant *l(3)tb* with lethal *P*-insertion allele *DCP2*<sup>BG01766</sup>.** Images in A and B  
51 showing the compound eye of wild type and trans-heterozygote respectively while A' and B' are their  
52 respective nail-polish imprint of the compound eye, viewed with the help of DIC or Nomarski  
53 microscope. The exact geometrical arrangement of ommatidia in a hexagonal pattern having each  
54 ommatidium surrounded by bristle was completely disrupted in the trans-heterozygote exhibiting the  
55 complete loss of arrangement in the ommatidial pattern. This represents the severe loss of polarity as it  
56 cues a complete disassembly of compound eye as whole. Bar represents 20µm.

57

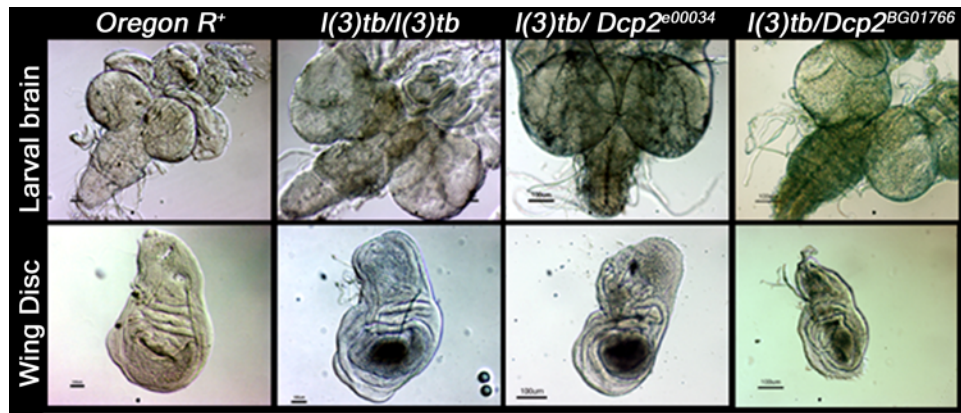

58

59 **Figure S4.** Tumorous phenotype observed in larval brain and wing imaginal discs in trans-heterozygotes  
60 *l(3)tb* /*PBac{RB}DCP2<sup>e00034</sup>* and *l(3)tb* /*P{GT1}DCP2<sup>BG01766</sup>* as homozygous *l(3)tb* Scale bar is 100µm.

61



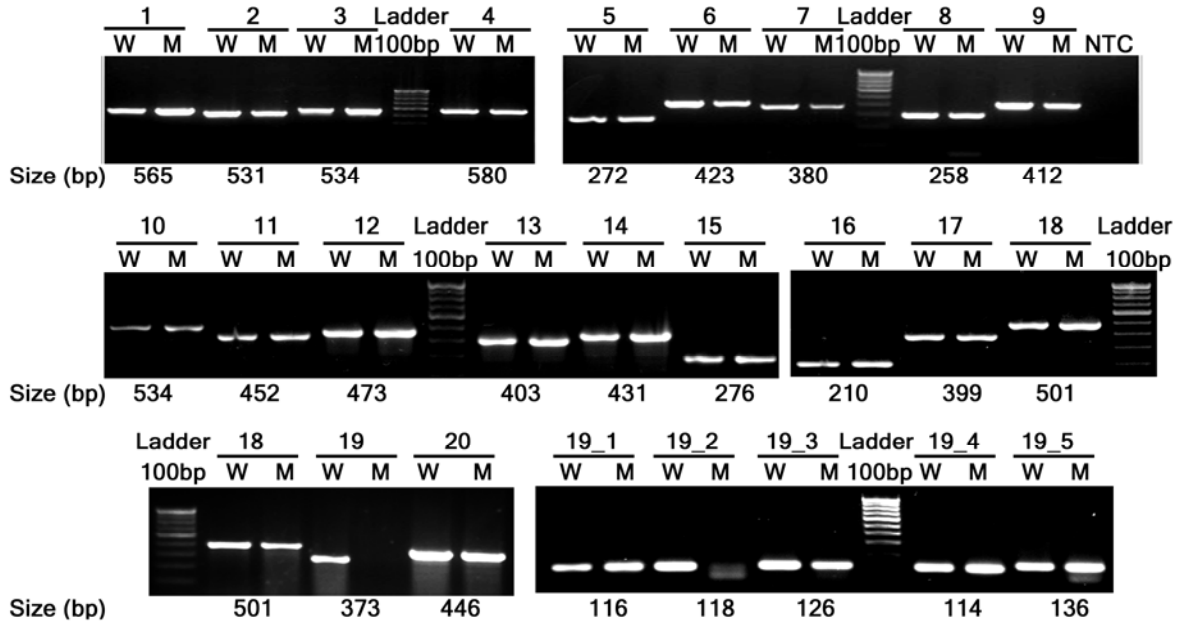

62

63 **Figure S5.** Amplification of *DCP2* using overlapping primers. All primers amplify same size of amplicon  
64 with DNA from wild type and homozygous l(3)tb mutant, except *DCP2\_P19* (3L:15819379..15819751)  
65 and *DCP2\_P19\_2* (3L:15819452..15819569). This implies the probable mutation in the region.

66

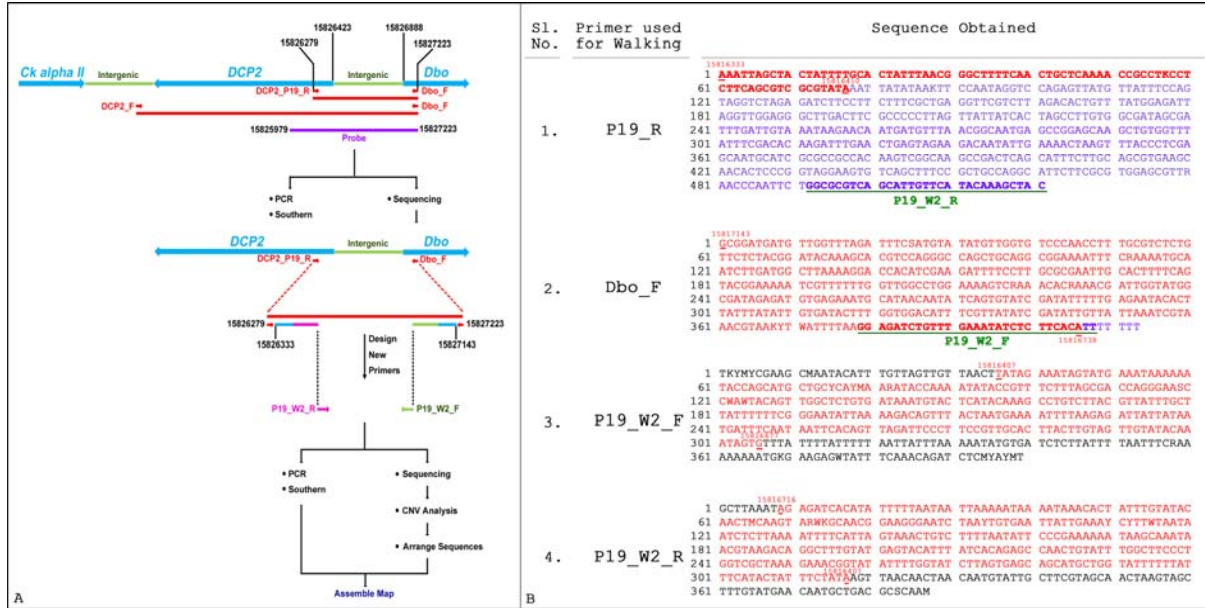

67

68 **Figure S6.** Schematic representation of the convergent bidirectional primer walking adopted for  
69 sequencing and alignment of the large amplicon obtained at the candidate region in  $DCP2^{(3)hb}$   
70 homozygotes (A). Shown in differently colored arrows are the primers used for sequencing during  
71 walking. Reads aligning to the gene regions are represented by blue lines, while those aligning to the  
72 intergenic regions are depicted by green lines. The primers designed are represented in similar colors  
73 depending on their alignment in the sequence. The reads obtained on sequencing with each of the four  
74 primers is shown in B. The *Gypsy*-LTR sequence is shown in purple. Underlined in 1 and 2 are the  
75 sequences used as primers for the second-step of primer walking.

1 **Supplementary Tables**

2 **A forward genetic approach to mapping a *P*-element second site mutation identifies *DCP2* as a**  
3 **novel tumor suppressor in *Drosophila melanogaster***

4 Rohit Kunar<sup>1a</sup>, Rakesh Mishra<sup>1a</sup>, Lolitika Mandal<sup>2</sup>, Debasmita P. Alone<sup>3</sup>, Shanti Chandrasekharan<sup>4</sup> and  
5 Jagat Kumar Roy<sup>1\*</sup>

6 <sup>1</sup>Cytogenetics Laboratory, Department of Zoology, Institute of Science, Banaras Hindu University,  
7 Varanasi–221005, Uttar Pradesh, India

8 <sup>2</sup>Department of Biological Sciences, Indian Institute of Science Education and Research (IISER) Mohali,  
9 Manauli–140306, India

10 <sup>3</sup>School of Biological Sciences, National Institute of Science Education and Research (NISER) PO  
11 Bhimpur-Padanpur, Pin–752050, Odisha, India

12 <sup>4</sup>Division of Genetics, Indian Agricultural Research Institute (IARI), Pusa, New Delhi, Delhi–110012,  
13 India

14  
15 <sup>a</sup> Both authors contributed equally to the work

16  
17 Email ID of authors –

18 Rohit Kunar: [rohit.kunar3@bhu.ac.in](mailto:rohit.kunar3@bhu.ac.in)  
19 Rakesh Mishra: [shivrakesh@gmail.com](mailto:shivrakesh@gmail.com)  
20 Lolitika Mandal: [lolitika@iisermohali.ac.in](mailto:lolitika@iisermohali.ac.in)  
21 Debasmita P Alone: [debasmita@niser.ac.in](mailto:debasmita@niser.ac.in)  
22 Shanti Chandrasekharan: [shanty@iari.res.in](mailto:shanty@iari.res.in)  
23 Jagat Kumar Roy: [jkroy@bhu.ac.in](mailto:jkroy@bhu.ac.in)

24  
25 **\*Address for Correspondence –**

26 Cytogenetics Laboratory, Department of Zoology,  
27 Institute of Science, Banaras Hindu University,  
28 Varanasi – 221005, Uttar Pradesh, India.  
29 Phone: +91-542-236-8145 Fax: +91-542-236-8457  
30 E-mail: [jkroy@bhu.ac.in](mailto:jkroy@bhu.ac.in)

31  
32 **Running title – *Drosophila DCP2* is a tumour suppressor**

33 **Table S1. Complementation status of *l(3)tb* with cytologically mapped deletion lines**

| <b>S.No.</b> | <b>Bloomington<br/>Stock Number</b> | <b>Deletion Lines</b>                                                        | <b>Estimated<br/>Cytological<br/>Break points</b> | <b>Status<br/>of<br/>Complementation</b> |
|--------------|-------------------------------------|------------------------------------------------------------------------------|---------------------------------------------------|------------------------------------------|
| 1.           | BL: 6554                            | <i>Df(3L)XG8</i>                                                             | 71C3-D1;71F2-5                                    | No                                       |
| 2.           | BL:6548                             | <i>Df(3L)XG1</i>                                                             | 71C3-D1;71F2-5                                    | No                                       |
| 3.           | BL:6603                             | <i>Df(3L)X-21.2</i>                                                          | 71F1;72A2                                         | No                                       |
| 4.           | BL:6157                             | <i>Df(3L)D-5rv12,e<sup>1</sup></i>                                           | 70C2;72A1                                         | No                                       |
| 5.           | BL:6558                             | <i>Df(3L)XG15</i>                                                            | 71A3;71F4                                         | Yes                                      |
| 6.           | BL:3641                             | <i>Df(3L)th<sup>102</sup>,h<sup>1</sup>,kni<sup>ri-1</sup>,e<sup>1</sup></i> | 72A2;72D10                                        | Yes                                      |

34

35

36 **Table S2. Complementation analysis of *l(3)tb* with lethal transposon insertion lines**

| S. No. | Stock | Symbol                                      | Gene Affected/<br>Estimated cytology* | Genomic<br>Sequence<br>Coordinates* | Complementation Status |
|--------|-------|---------------------------------------------|---------------------------------------|-------------------------------------|------------------------|
| 1.     | 18573 | <i>PBac{WH}DCX-EMAP<sup>02655</sup></i>     | <i>DCX-EMP</i><br>71A2                | 3L:14933115..14933115               | YES                    |
| 2.     | 12791 | <i>P{GT1}mnd<sup>BG01434</sup></i>          | <i>minidiscs (mnd)</i><br>71A4        | 3L:14980561..14980561               | YES                    |
| 3.     | 17084 | <i>P{EP}Prosbeta2<sup>EP306</sup></i><br>7  | <i>Proteosome subunit</i><br>71B1     | 3L:14993119..14993119               | YES                    |
| 4.     | 12089 | <i>P{lacW}cp309<sup>s2172</sup></i>         | <i>cp309</i><br>71B3                  | 3L:15072574..15072574               | YES                    |
| 5.     | 21206 | <i>P{EPgy2}cp309<sup>EY1637</sup></i><br>6  | <i>cp309</i><br>71B3                  | 3L:15072713..15072713               | YES                    |
| 6.     | 16007 | <i>P{EPgy2}Aats-gly<sup>EY09021</sup></i>   | <i>Glycyl synthetase</i><br>71B4      | 3L:15088255..15088255               | YES                    |
| 7.     | 12090 | <i>P{lacW}l(3)j2A2<sup>j2A2</sup></i>       | <i>lethal(3)j2A2</i><br>71B5          | 3L:15134670..15134670               | YES                    |
| 8.     | 34467 | <i>Mi{MIC}Toll-6<sup>M102127</sup></i>      | <i>Toll-6</i><br>71C2                 | 3L:15332734                         | YES                    |
| 9.     | 16100 | <i>PBac{5HPw[+]}CG7841<sup>A372</sup></i>   | <i>CG7841</i><br>71D3                 | 3L:15500292..15500292               | YES                    |
| 10.    | 21095 | <i>P{EPgy2}CrebA<sup>EY134</sup></i><br>94  | <i>CrebA</i><br>71E1                  | 3L:15529167..15529167               | YES                    |
| 11.    | 10183 | <i>P{PZ}CrebA<sup>03576</sup></i>           | <i>CrebA</i><br>71E1                  | 3L:15537388..15537388               | YES                    |
| 12.    | 12091 | <i>P{lacW}l(3)s1754<sup>s175</sup></i><br>4 | <i>lethal(3)s1754</i><br>71E1         | 3L:15556710..15556710               | YES                    |
| 13.    | 12092 | <i>P{lacW}RhoGAP71E<sup>j6B9</sup></i>      | <i>RhoGAP71E</i><br>71E1              | 3L:15582004..15582004               | YES                    |
| 14.    | 15523 | <i>P{EPgy2}mrn<sup>EY01615</sup></i>        | <i>marionette</i><br>71E1             | 3L:15573609..15573609               | YES                    |
| 15.    | 12100 | <i>P{lacW}RhoGAP71E<sup>s1629a</sup></i>    | <i>RhoGAP71E</i><br>71E1              | 3L:15582004..15582004               | YES                    |
| 16.    | 17134 | <i>P{EP}RhoGAP71E<sup>EP</sup></i><br>3492  | <i>RhoGAP71E</i><br>71E1              | 3L:15586701..15586701               | YES                    |
| 17.    | 22649 | <i>P{EPgy2}CG7650<sup>EY2</sup></i><br>3633 | <i>CG7650</i><br>71E2                 | 3L:15603462..15603462               | YES                    |
| 18.    | 23596 | <i>Mi{ET1}CG7579<sup>MB02</sup></i><br>986  | <i>CG7579</i><br>71F1                 | 3L:15676129..15676129               | YES                    |
| 19.    | 16186 | <i>PBac{5HPw<sup>+</sup>}B259</i>           | 71F2                                  | 3L:15700304..15700304               | YES                    |
| 20.    | 17644 | <i>P{EPgy2}comm<sup>EY1015</sup></i><br>4   | <i>commisureless</i><br>71F2          | 3L:15721560..15721560               | YES                    |
| 21.    | 21983 | <i>P{EPg}fwe<sup>HP35545</sup></i>          | <i>flower</i>                         | 3L:15809466..15809466               |                        |

|            |       |                                         |                                   |                       |            |
|------------|-------|-----------------------------------------|-----------------------------------|-----------------------|------------|
|            |       |                                         | 72A1                              | 09466                 | <b>YES</b> |
| <b>22.</b> | 12794 | <i>P{GTI}DCP2<sup>BG01766</sup></i>     | <i>Decapping protein2</i><br>72A1 | 3L:15819332..15819332 | <b>NO</b>  |
| <b>23.</b> | 23591 | <i>Mi{ETI}CG32150<sup>MB02846</sup></i> | CG32150<br>72A2                   | 3L:15834442..15834442 | <b>YES</b> |
| <b>24.</b> | 25339 | <i>Mi{ETI}pHCl<sup>MB06931</sup></i>    | <i>pHCl</i><br>72A3               | 3L:15863723..15863723 | <b>YES</b> |
| <b>25.</b> | 22126 | <i>P{EPg}HP36806</i>                    | 72B2                              | 3L:15948256..15948256 | <b>YES</b> |

37

38 Allele of *Decapping protein 2* (*P{GTI}DCP2<sup>BG01766</sup>*), reported to be semi-lethal in the FlyBase showed  
39 non-complementation to the mutation in *l(3)tb*. \*Designates the current annotation and cytological  
40 positions and molecular insertion sites as per FlyBase (R5).

41

42 **Table S3. Primers used for characterizing deletion in *Df(3L)RM95*.**

43

44

45

46

47

48

49

50

51

52

53

54

| PRIMER SYMBOL | PRIMER DETAILS            |                         |                                   |                     |          |                       | PARAMETER                        |
|---------------|---------------------------|-------------------------|-----------------------------------|---------------------|----------|-----------------------|----------------------------------|
|               | PRIMER (10 pmol/ $\mu$ L) | SEQUENCE (5'→3')        | MOLECULAR POSITIONS (FlyBase, R5) | T <sub>m</sub> (°C) | 'GC' (%) | AMPLICON SIZE (in bp) | T <sub>a</sub> (°C) / Ext. (sec) |
| Custom A      | FOR                       | GCACCAACTGAGCTGTATC     | 15525318-                         | 54.1                | 52.6     | 420                   | 54 <sup>0</sup> C/ 30sec         |
| PRY4          | REV                       | CAATCATATCGCTGTCTCACTCA |                                   | 60.3                | 43.5     |                       |                                  |
| W7500D        | FOR                       | GTCCGCCTTCAGTTGCACTT    |                                   | 62.7                | 55.0     | 1600                  | 6 <sup>0</sup> C/ 1min           |
| W11678U       | REV                       | TCATCGCAGATCAGAAGCGG    |                                   | 64.9                | 55.0     |                       |                                  |
| 3. PRY4       | FOR                       | CAATCATATCGCTGTCTCACTCA | -15948402                         | 60.3                | 43.5     | 360                   | 54 <sup>0</sup> C / 1min         |
| Custom B      | REV                       | TAGTCCACGTAAGGTGCAC     |                                   | 54.3                | 55.6     |                       |                                  |

55 Custom A and custom B primers were designed from the genomic region upstream and downstream to the region where the P{RS5} and P{RS3}  
 56 progenitor element localized so that with the combination of PRY4, could give 420 bp and 360 bp amplicon respectively.

57

58 **Table S4.** Overlapping set of primers for *DCP2* gene and thermal cycler conditions of annealing temperature and extension time for each primer  
 59 pair to amplify the genomic region of *DCP2* gene in the homozygous *l(3)tb* mutant.

| PRIMER SYMBOL | PRIMER DETAILS      |                                 |                                   |         |          |                       |
|---------------|---------------------|---------------------------------|-----------------------------------|---------|----------|-----------------------|
|               | PRIMER (10 pmol/μL) | SEQUENCE (5'→3')                | MOLECULAR POSITIONS (FlyBase, R5) | Tm (°C) | 'GC' (%) | AMPLICON SIZE (in bp) |
| DCP2_P1       | FOR                 | AGGCTTCTCTCCCCGTA ACT           | 15813182-15813746                 | 62.7    | 57.1     | 565                   |
|               | REV                 | CTGCGGGGCGAGA ACACGAT           |                                   | 70.0    | 65.0     |                       |
| DCP2_P2       | FOR                 | TTCATAGGTGGGGGCGGGCA            | 15813671-15814201                 | 71.8    | 65.0     | 531                   |
|               | REV                 | ACGTTAGGGAACCACAAACACACCT       |                                   | 65.9    | 48.0     |                       |
| DCP2_P3       | FOR                 | TGTGCTGAGCGGAAGACTCTCGTTT       | 15814054-15814635                 | 69.5    | 52.0     | 582                   |
|               | REV                 | GCAGCAGCTGGGAATCGACTTTACG       |                                   | 70.7    | 56.0     |                       |
| DCP2_P4       | FOR                 | ATTTGGCGTAAAGTCGATTC            | 15814605-15815184                 | 56.9    | 40.0     | 580                   |
|               | REV                 | CAAGCAATGAGAAGGTGAGT            |                                   | 55.4    | 45.0     |                       |
| DCP2_P5       | FOR                 | AGGATTTTGACTGGCTGCTG            | 15814960-15815231                 | 60.4    | 50.0     | 272                   |
|               | REV                 | GCGTCAACTGTTCCATAGCC            |                                   | 60.7    | 55.0     |                       |
| DCP2_P6       | FOR                 | GGAACAGTTGACGCTTCGAG            | 15815218- 15815640                | 61.0    | 55.0     | 423                   |
|               | REV                 | GCCTGAAGAAGTGGGTGAAC            |                                   | 59.7    | 55.0     |                       |
| DCP2_P7       | FOR                 | CTTATTGCGTTTCCCATTGC            | 15815330-15815709                 | 60.5    | 45.0     | 380                   |
|               | REV                 | ATGCCATATCAAAGGCCAAG            |                                   | 59.9    | 45.0     |                       |
| DCP2_P8       | FOR                 | AGCCTTCCGATCGTTCACCCAC          | 15815609-15815909                 | 68.8    | 59.1     | 301                   |
|               | REV                 | GGTTTATGAGGAGACCGGGTTCG         |                                   | 66.9    | 56.5     |                       |
| DCP2_P9       | FOR                 | ATGTTTCGCACCACGTACAG            | 15815802- 15816213                | 59.6    | 50.0     | 412                   |
|               | REV                 | GCTATCGGTGCCCACTTATG            |                                   | 60.5    | 55.0     |                       |
| DCP2_P10      | FOR                 | ATAGCGCCATAAGTGGGCACCGATA       | 15816187-15816720                 | 69.9    | 52.0     | 534                   |
|               | REV                 | ACTCCTCCTACGGCAGCTCATCATC       |                                   | 68.0    | 56.0     |                       |
| DCP2_P11      | FOR                 | GATGATGAGCTGCCGTAGGAGGAGT       | 15816696-15817147                 | 68.0    | 56.0     | 452                   |
|               | REV                 | CTATCAGTTTCTTGGGGCCGTGTGC       |                                   | 70.4    | 56.0     |                       |
| DCP2_P12      | FOR                 | GCACACGGCCCCAAGAACTG            | 15817123-15817595                 | 69.2    | 61.9     | 473                   |
|               | REV                 | AGGCTCTTACAAAGGGTGCTTATCGA<br>A |                                   | 66.9    | 44.4     |                       |
| DCP2_P13      | FOR                 | TCGATAAGCACCCCTTGTAAAGAGCCT     | 15817570-15817972                 | 66.2    | 46.2     | 403                   |
|               | REV                 | CACCAGTCTACGTTATCGGGGTCGT       |                                   | 68.2    | 56.0     |                       |



|          |     |                                |                    |      |      |     |
|----------|-----|--------------------------------|--------------------|------|------|-----|
| DCP2_P14 | FOR | AGTGCTGCAGTACGACCCCGATA        | 15817937-15818367  | 67.1 | 56.5 | 431 |
|          | REV | ACAATCAGAATATCTCCCACCCAGCA     |                    | 67.7 | 46.2 |     |
| DCP2_P15 | FOR | TGCTGGGTGGGAGATATTCTGATTGT     | 15818342-15818617  | 67.7 | 46.2 | 276 |
|          | REV | CGTCTCTGCCTCTGCTAGCGT          |                    | 64.4 | 61.9 |     |
| DCP2_P16 | FOR | ACGCTAGCAGAGGCAGAGAC           | 15818597- 15818806 | 59.9 | 60.0 | 210 |
|          | REV | CAGAGAGAGACGCGAATGTG           |                    | 59.7 | 55.0 |     |
| DCP2_P17 | FOR | AGAGGCAGAGGCTGTGACGAC          | 15818623-15819021  | 64.4 | 61.9 | 399 |
|          | REV | TTCGTGCGACAAAAGCGGACG          |                    | 70.7 | 57.1 |     |
| DCP2_P18 | FOR | TGCAATCGTCCGCTTTTGTGCGCA       | 15818995-15819495  | 73.6 | 52.2 | 501 |
|          | REV | AGAGGAAGGCGAGTTTTGAGCAGT       |                    | 65.9 | 50.0 |     |
| DCP2_P19 | FOR | TGCTCACCGAACTTTTTCGCGATCT      | 15819379-15819751  | 70.7 | 48.0 | 373 |
|          | REV | GTGCAACGGAAGGGAATCTAACTGT<br>G |                    | 67.8 | 50.0 |     |
| DCP2_P20 | FOR | CACAGTTAGATTCCCTTCCGTTGCAC     | 15819726- 15820171 | 67.8 | 50.0 | 446 |
|          | REV | ACAAAGCACGTCCAGGGCCA           |                    | 68.4 | 60.0 |     |

60  
61

62 **Table S5.** Overlapping set of primers to amplify the genomic region in *DCP2* gene for the region covered by the DCP2\_P19 set of primers in the  
 63 homozygous *l(3)tb* mutant.

| PRIMER SYMBOL | PRIMER DETAILS      |                                |                 |                  |                                   |         |          |
|---------------|---------------------|--------------------------------|-----------------|------------------|-----------------------------------|---------|----------|
|               | PRIMER (10 pmol/μL) | SEQUENCE (5'→3')               | TEMPLATE STRAND | LENGTH (in ntd.) | MOLECULAR POSITIONS (FlyBase, R5) | Tm (°C) | 'GC' (%) |
| DCP2_P19_1    | FOR                 | TAAATTGCCTTTATTTACACGTTGC      | PLUS (+)        | 25               | 15819403-15819518                 | 60.6    | 32.0     |
|               | REV                 | ACTATTTCTATACGCGACGCTGAAG      | MINUS(-)        | 25               |                                   | 62.1    | 44.0     |
| DCP2_P19_2    | FOR                 | ACTATTTAACGGGCTTTTCAACTG       | PLUS (+)        | 24               | 15819452-15819569                 | 60.0    | 37.5     |
|               | REV                 | CGGTATATTTTGGTATCTTAGTGAGC     | MINUS(-)        | 26               |                                   | 58.7    | 38.5     |
| DCP2_P19_3    | FOR                 | CAGCGTCGCGTATAGAAATAGTATG      | PLUS (+)        | 25               | 15819497-15819622                 | 67.7    | 46.2     |
|               | REV                 | AGTACATTTATCACAGAGCCTCAACTG    | MINUS(-)        | 25               |                                   | 58.8    | 40.0     |
| DCP2_P19_4    | FOR                 | GCTCACTAAGATACCAAATATACC<br>G  | PLUS (+)        | 26               | 15819544-15819657                 | 58.7    | 38.5     |
|               | REV                 | AAAATAAGCAAATAACGTAAGACAG<br>G | MINUS(-)        | 26               |                                   | 58.5    | 30.8     |
| DCP2_P19_5    | FOR                 | AAGCCTGTCTTACGTTATTTGCTTA      | PLUS (+)        | 25               | 15819629-15819764                 | 59.8    | 36.0     |
|               | REV                 | CAACTACAAGTAAGTGCAACGGAAG      | MINUS(-)        | 25               |                                   | 61.4    | 44.0     |

64  
 65  
 66  
 67

68 **Table S6.** Overlapping set of primers to amplify the complete 5'UTR of genomic region in *DCP2* gene in the homozygous *l(3)tb* mutant. The  
 69 table also documents the thermal cycler conditions of annealing temperature and extension time for each primer pair. Genomic region amplified  
 70 by primer pair is also mentioned.

| PRIMER SYMBOL | PRIMER DETAILS      |                           |                                   |                     |          |                       |
|---------------|---------------------|---------------------------|-----------------------------------|---------------------|----------|-----------------------|
|               | PRIMER (10 pmol/μL) | SEQUENCE (5'→3')          | MOLECULAR POSITIONS (FlyBase, R5) | T <sub>m</sub> (°C) | 'GC' (%) | AMPLICON SIZE (in bp) |
| DCP2_5'UTR1   | FOR                 | GTACTCTAGTTATTCCATCGGTTGC | 15819051-15819563                 | 59.5                | 44.0     | 513                   |
|               | REV                 | ATTTTGGTATCTTAGTGAGCAGCAT |                                   | 59.6                | 36.0     |                       |
| DCP2_5'UTR2   | FOR                 | TTTTGCTATTGTTCTCTCGATTTTC | 15819085-15819652                 | 60.1                | 32.0     | 568                   |
|               | REV                 | AAGCAAATAACGTAAGACAGGCTTT |                                   | 60.8                | 36.0     |                       |
| DCP2_5'UTR3   | FOR                 | AAGCCTGTCTTACGTTATTTGCTTA | 15819629-15820187                 | 59.8                | 36.0     | 459                   |
|               | REV                 | TCTGTTCTCTACGGATACAAAGCAC |                                   | 61.0                | 44.0     |                       |

71
